# Supplementary material for: Transient reliance on carbon removal and storage in long-term energy system transitions
Source: Research Square preprint supplement (doi:10.21203/rs.3.rs-8393021/v1), 2026-01-30
Supplement: Supplementary file 1 [file 7fb4c1b558d8a335b695faea.pdf]

## **List of Supplementary materials**

**Supplementary Note 1 CDR issues**

**Supplementary Note 2 Sensitivity analysis**

**Supplementary Note 3 Interpretation of feasibility assessment**

**Supplementary Table 1 List of indicators that are used for feasibility assessment**

**Supplementary Table 2 Aggregated regional classifications and AIM-Hub native regions.**

**Supplementary Table 3 AIM-Hub native region definitions.**

**Supplementary Figure 1 Primary energy supply by energy sources for four main scenarios.**

**Supplementary Figure 2 Total final energy consumption by energy carriers.**

**Supplementary Figure 3 Final energy consumption in industrial sector by energy carriers.**

**Supplementary Figure 4 Final energy consumption in shipping (part of transportation sector) by energy carriers.**

**Supplementary Figure 5 Final energy consumption in aviation (part of transportation sector) by energy carriers.**

**Supplementary Figure 6 Feasibility challenges assessment across all indicators for R5OECD90+EU (OECD and EU) region.**

**Supplementary Figure 7 Feasibility challenges assessment across all indicators for R5ASIA (Asian) region**

**Supplementary Figure 8 Feasibility challenges assessment across all indicators for R5LAM (Latin America) region**

**Supplementary Figure 9 Feasibility challenges assessment across all indicators for R5MAF (Middle East and Africa) region**

**Supplementary Figure 10 Feasibility challenges assessment across all indicators for R5REF (reforming economy) region**

**Supplementary Figure 11 Feasibility assessment using sensitivity analysis scenarios. The indicators and its criteria of feasibility challenge are same as the main assessment (See method)**

**Supplementary Figure 12 Poverty headcount by aggregated regions**

**Supplementary Figure 13 Population at risk of hunger by aggregated regions**

**Supplementary Figure 14 Biodiversity index using BII and forest area.**

**Supplementary Figure 15 Global mean temperature changes from preindustrial level. The emissions after 2100 is assumed to be constant as in 2100.**

**Supplementary Figure 16 Modeling framework**



### **Supplementary Note 1 CDR issues**

We have to admit that this study could not or did not intend to resolve all CDR shortcomings that mentioned in chapter 12 of WGIII of AR6<sup>1</sup>. They are at least 1) obstruct near-term emissions reduction efforts, 2) might lead to an overreliance on technologies that are still in their infancy, 3) could overburden future generations, 4) might evoke new conflicts over equitable burden-sharing, 5) could impact food security, biodiversity or land rights, 6) might be perceived negatively by stakeholders and broader public audiences. We further added 7) ultimate sustainability issue beyond 2100. For 3), 5) and 7), we directly addressed within the context of model output. For 1), 2) and 6), these are more or less related to how the society, individual agents, policy makers or stakeholders would react, make actions and/or perceive the IAM scenario information and probably difficult to be addressed within this study. As we stated in the discussion section, we leave the issue related to equity concerns 4) for the future studies because there are equity concerns that can be seen in general climate change mitigation scenarios. Hopefully this can be addressed in the near future.

The temperature overshoot is also remaining which would further impose the risk of climate change impacts<sup>2</sup>.

### **Supplementary Note 2 Sensitivity analysis**

To assess the uncertainty and sensitivity of the TPCC results to key assumptions, we conducted several additional scenario experiments. The main purpose was to evaluate how the system behaves—and how overall feasibility is affected—when subject to stress conditions that make climate-change mitigation more challenging. Specifically, we examined three sensitivity cases: (a) Delayed policy action, in which climate policies are not implemented until 2030 (TPCC\_del); (b) Slower technological cost reduction, assuming 1.5 times higher costs for DAC and hydrogen technologies (TPCC\_highHyd, TPCC\_highDAC); and, (c) Restrictions on CDR technologies, limiting the availability of BECCS and enhanced weathering (TPCC\_NoBECCS, TPCC\_NoEW). As shown, indicators related to the physical dimensions of the energy system, CCS, and agricultural or land-use sectors remain largely unchanged across all sensitivity cases (**Supplementary Figure 11**). The economic burden would be slightly responding due to the technological cost increases and unavailability of the CDRs yet structural characteristics of energy supply and emissions remain broadly stable due to limited alternative options. Similarly, restricting CDR technologies leads to a comparable increase in economic burden. Overall, these sensitivity analyses yield broadly consistent conclusions, indicating that although cost and energy requirements vary under stressed conditions, the fundamental feasibility characteristics and system responses remain robust across the tested assumptions.

### **Supplementary Note 3 Interpretation of feasibility assessment**

The evaluation of feasibility in this study draws extensively on the frameworks used in the literature<sup>3, 4</sup>. However, while these previous studies assessed feasibility using a composite index, we did not adopt such an aggregate approach here. Instead, we present and discuss individual indicators separately. The purpose of this study was to propose a new mitigation pathway and to identify where the main challenges lie. From this perspective, analyzing individual indicators provides a more informative understanding than using a single aggregated score. It should also be noted that, for several of the indicators, clear quantitative thresholds do not exist and the boundaries are based on expert judgement. We interpret these thresholds as being relatively conservative; therefore, an indicator classified as showing a high challenge does not necessarily imply infeasibility. We leave the interpretation of these results to the reader.

Supplementary Figures

World TPES

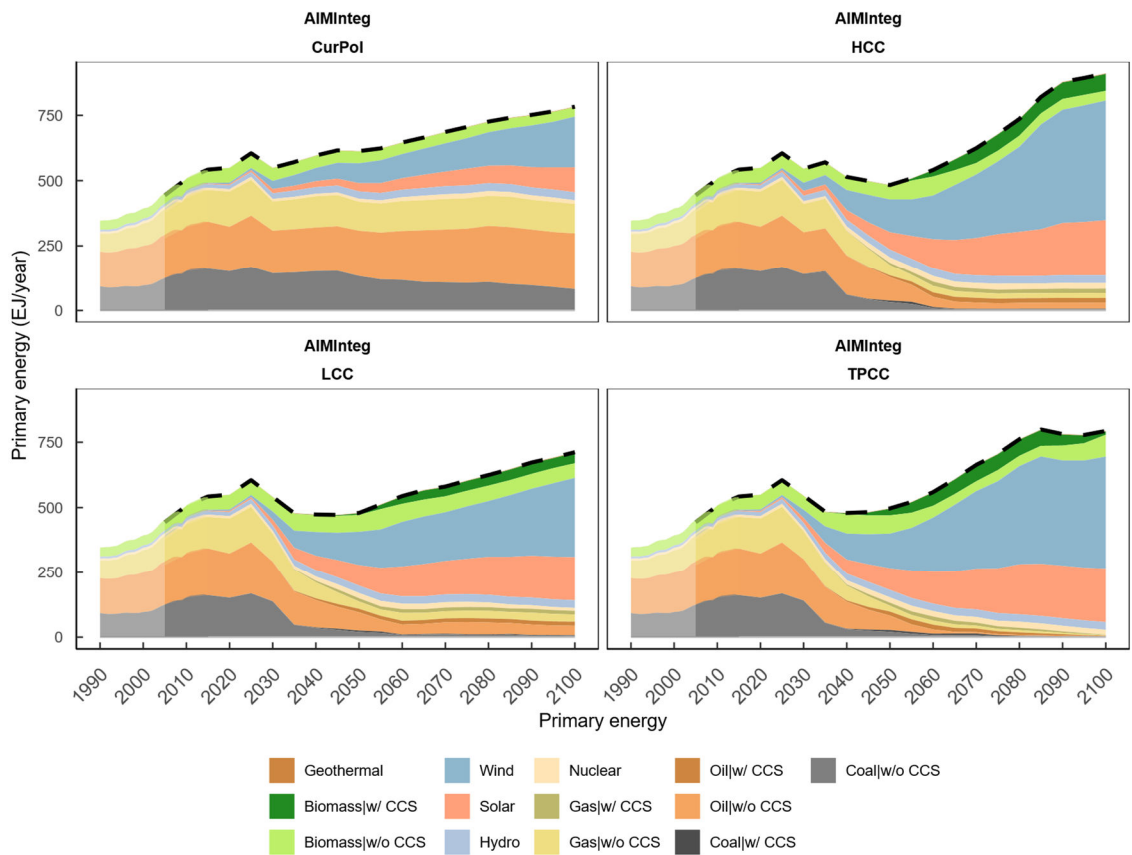

Supplementary Figure 1 Primary energy supply by energy sources for four main scenarios.

# World TFC\_fuel

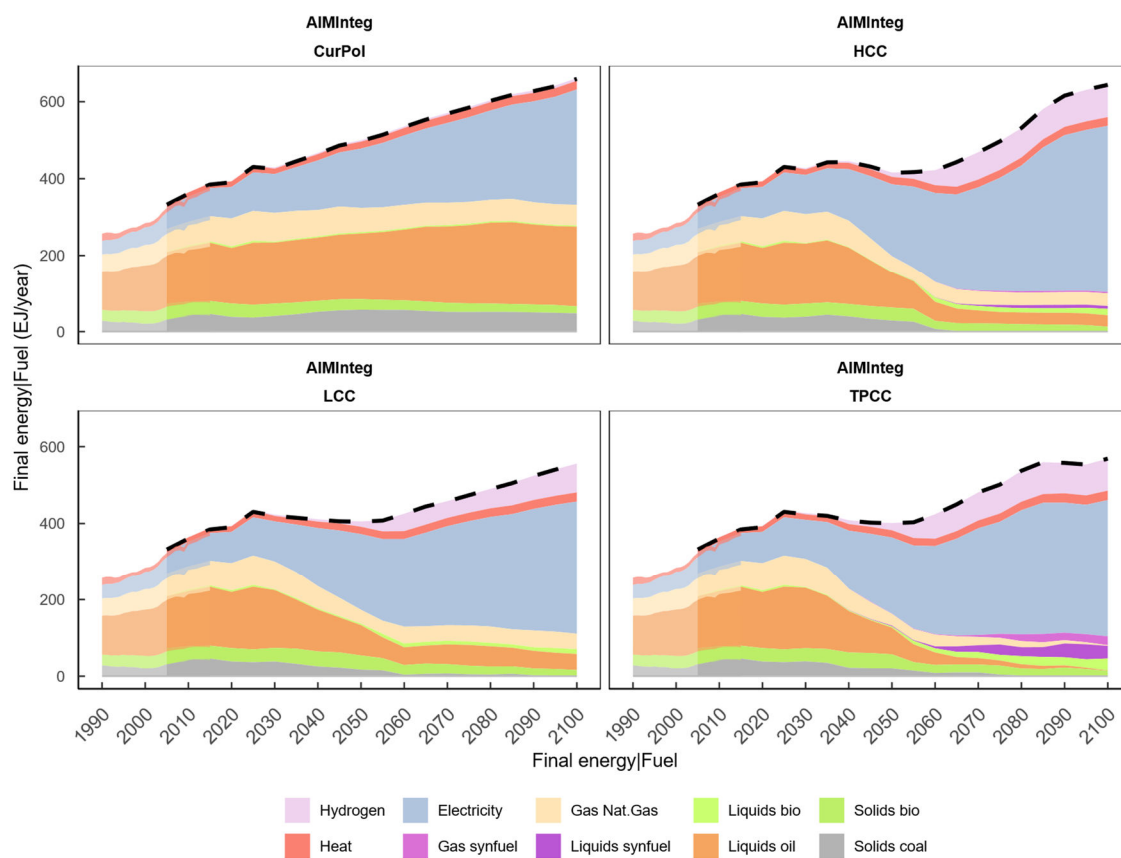

Supplementary Figure 2 Total final energy consumption by energy carriers.

World TFC\_Ind

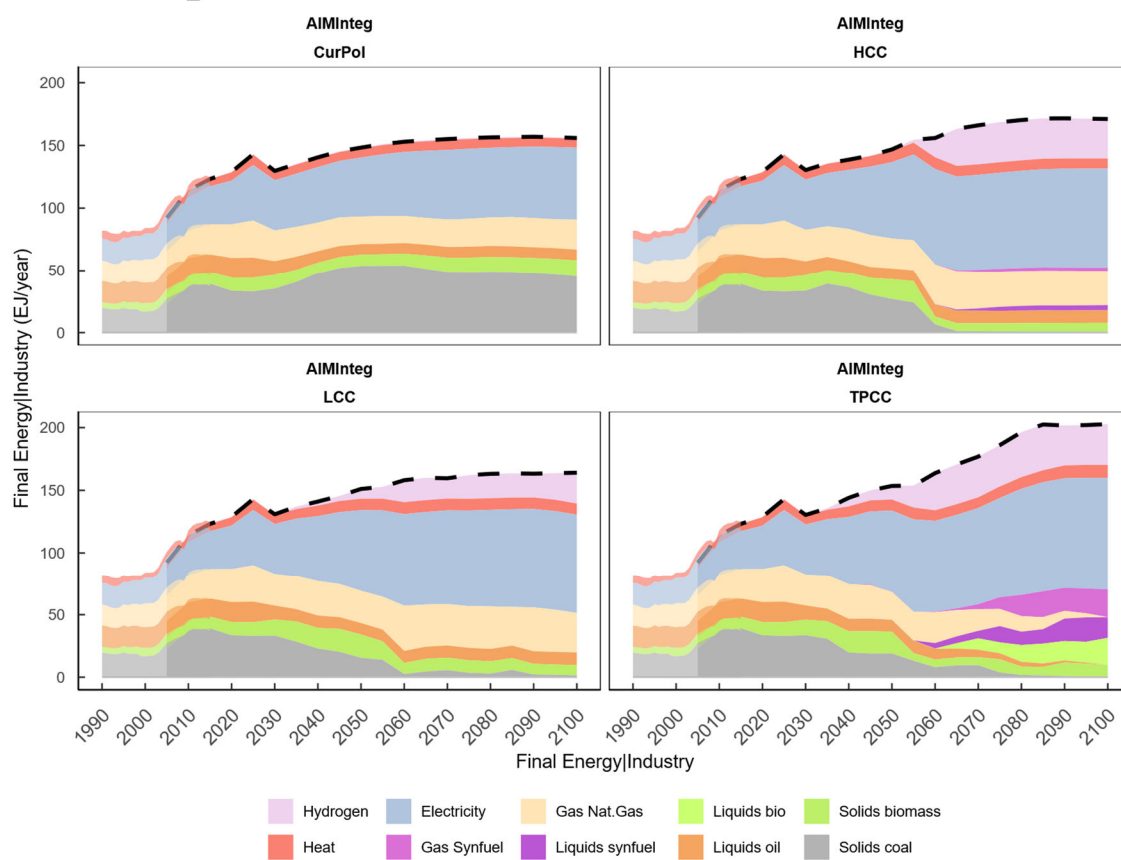

Supplementary Figure 3 Final energy consumption in industrial sector by energy carriers.

World TFC\_Tra\_Shi

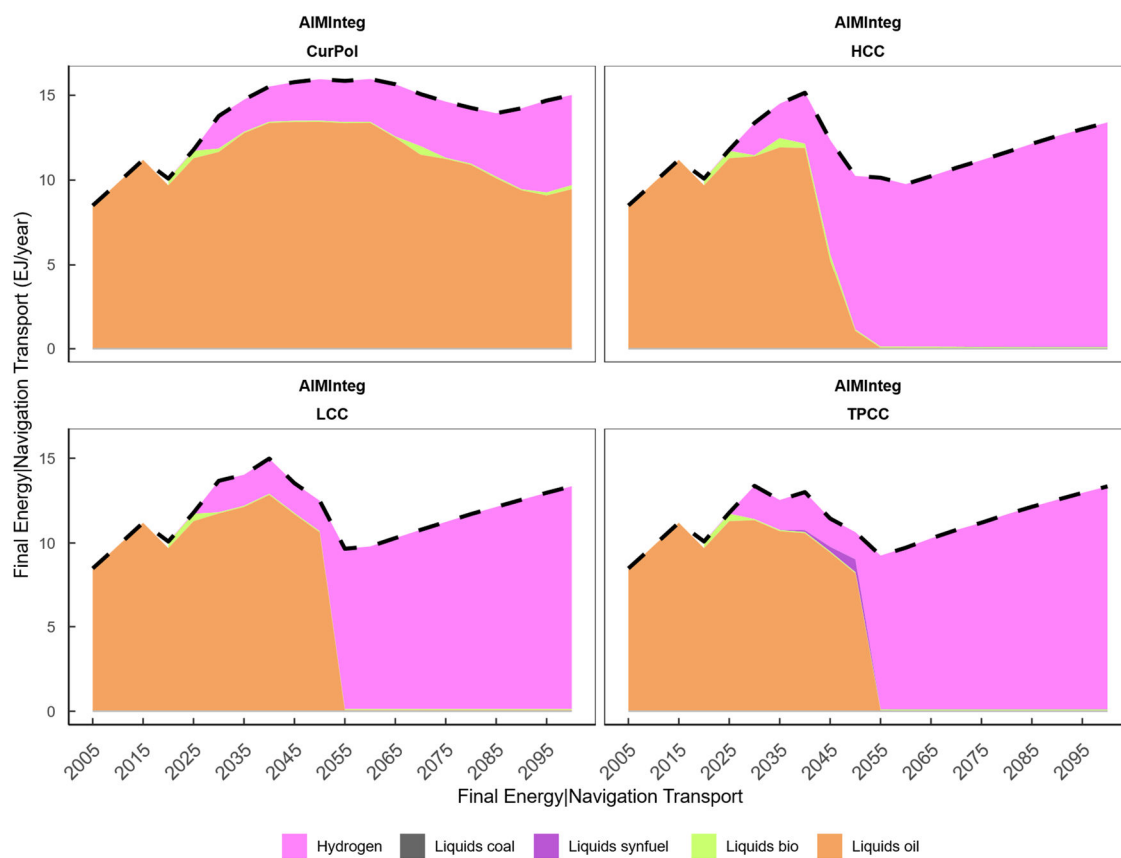

**Supplementary Figure 4 Final energy consumption in shipping (part of transportation sector) by energy carriers.**



# World TFC\_Tra\_Avi

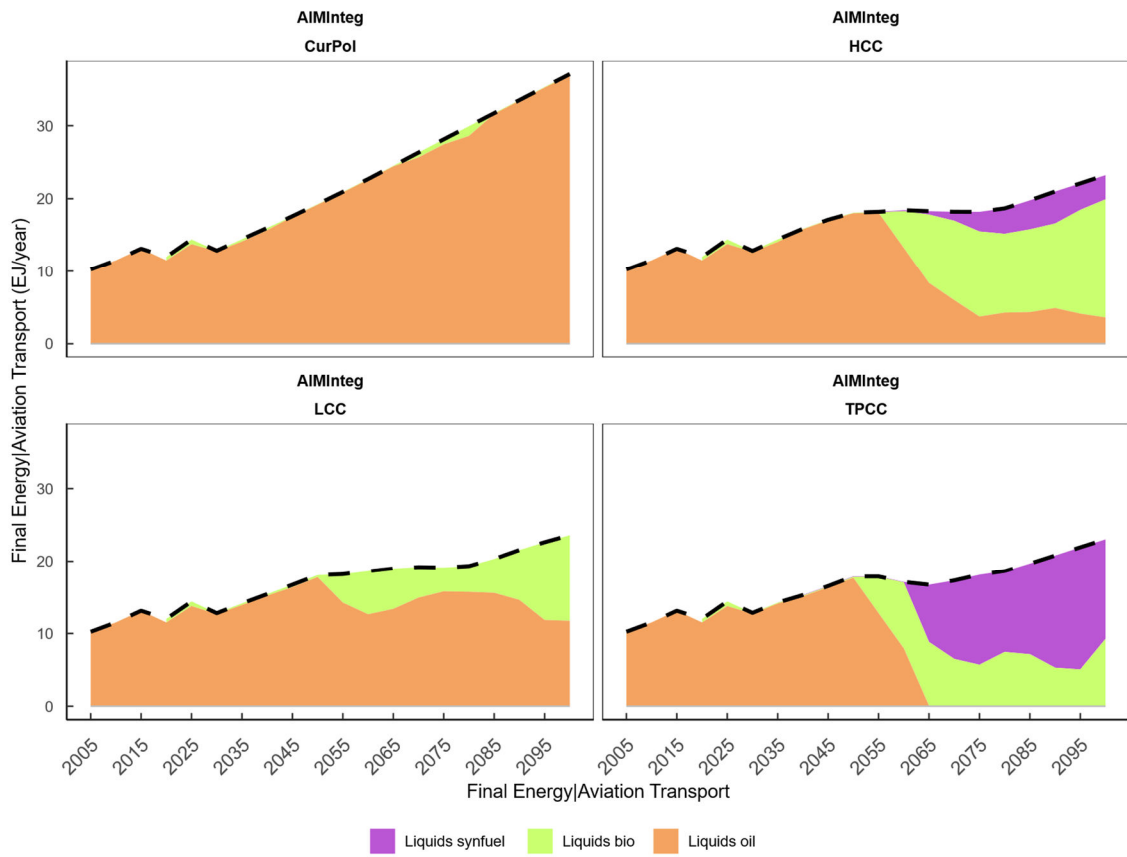

**Supplementary Figure 5 Final energy consumption in aviation (part of transportation sector) by energy carriers.**

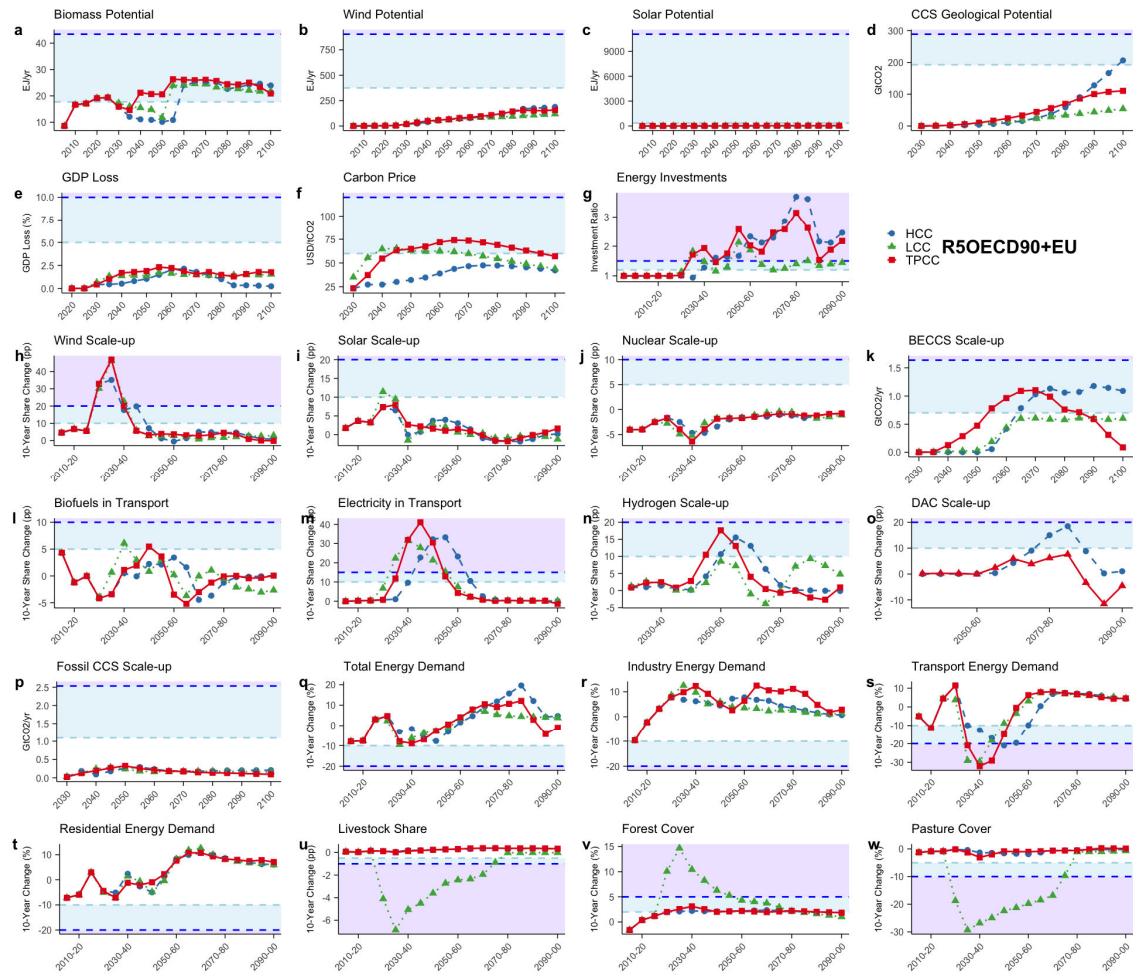

Supplementary Figure 6 Feasibility challenges assessment across all indicators for R5OECD90+EU (OECD and EU) region. Each panel represents the following indicators: Biomass/Wind/Solar/CCS (a–d); GDP loss (e); Carbon price (f); Energy investments (g); Wind/Solar/Wind/BECCS/Fossil CCS scale-up (h–l); Biofuels/Electricity in transport scale-up (m,n); Hydrogen/DAC scale-up (o,p); Decline in total/transport/industry/residential energy demand (q–t); Decline of livestock share in food demand (u); Forest cover increase (v); and Pasture cover decrease (w). Light blue and purple shaded ranges indicate medium and high levels of feasibility concern, respectively.

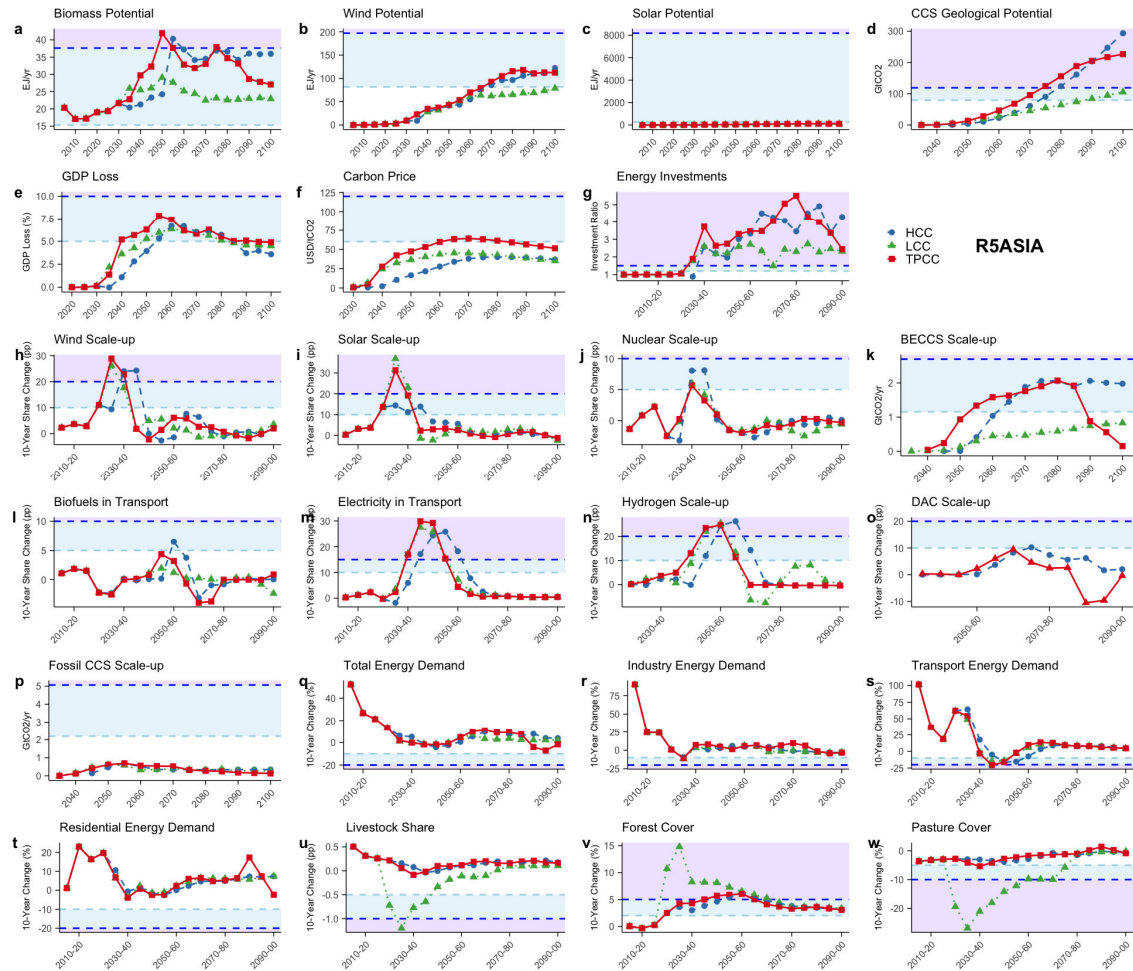

Supplementary Figure 7 Feasibility challenges assessment across all indicators for R5ASIA (Asian) region. Each panel represents the following indicators: Biomass/Wind/Solar/CCS (a–d); GDP loss (e); Carbon price (f); Energy investments (g); Wind/Solar/Wind/BECCS/Fossil CCS scale-up (h–l); Biofuels/Electricity in transport scale-up (m,n); Hydrogen/DAC scale-up (o,p); Decline in total/transport/industry/residential energy demand (q–t); Decline of livestock share in food demand (u); Forest cover increase (v); and Pasture cover decrease (w). Light blue and purple shaded ranges indicate medium and high levels of feasibility concern, respectively.

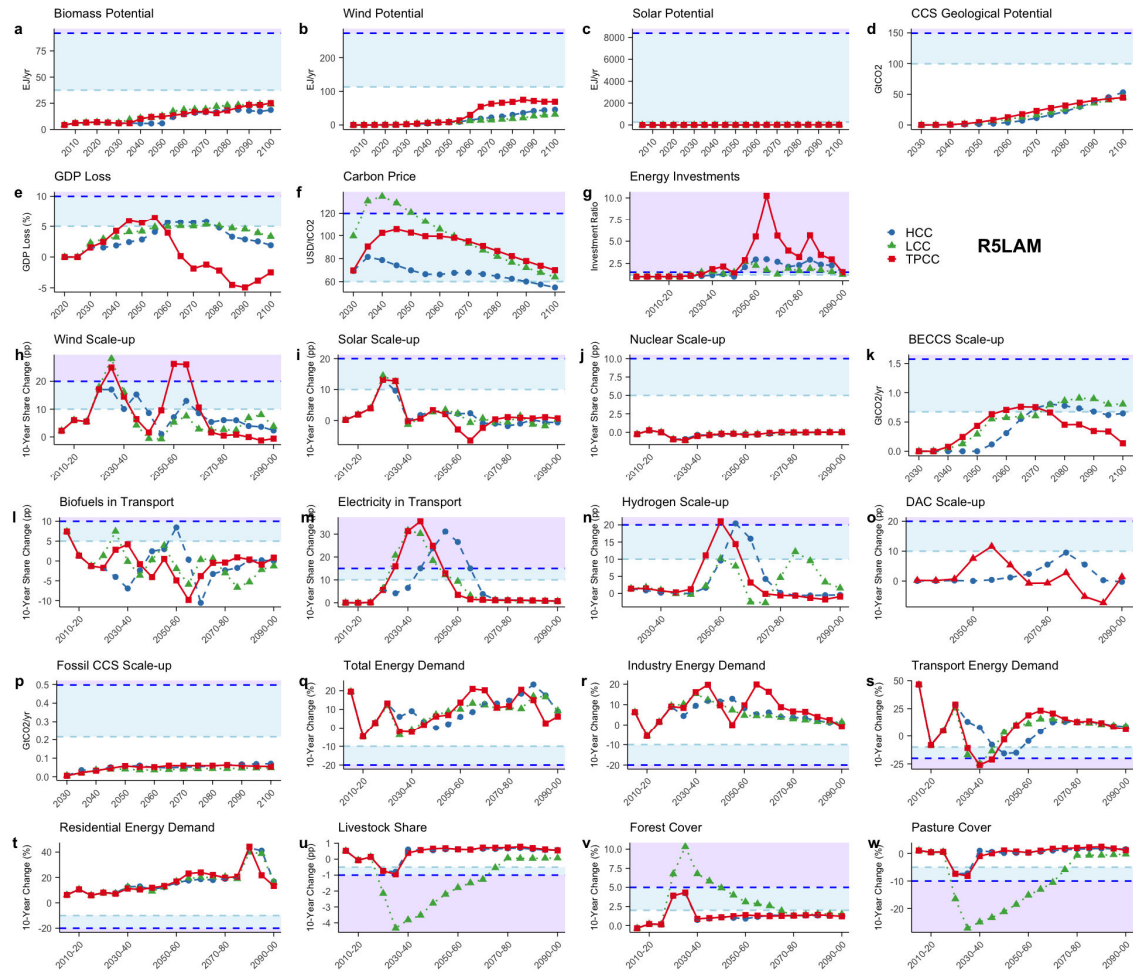

Supplementary Figure 8 Feasibility challenges assessment across all indicators for R5LAM (Latin America) region. Each panel represents the following indicators: Biomass/Wind/Solar/CCS (a–d); GDP loss (e); Carbon price (f); Energy investments (g); Wind/Solar/Wind/BECCS/Fossil CCS scale-up (h–l); Biofuels/Electricity in transport scale-up (m,n); Hydrogen/DAC scale-up (o,p); Decline in total/transport/industry/residential energy demand (q–t); Decline of livestock share in food demand (u); Forest cover increase (v); and Pasture cover decrease (w). Light blue and purple shaded ranges indicate medium and high levels of feasibility concern, respectively.

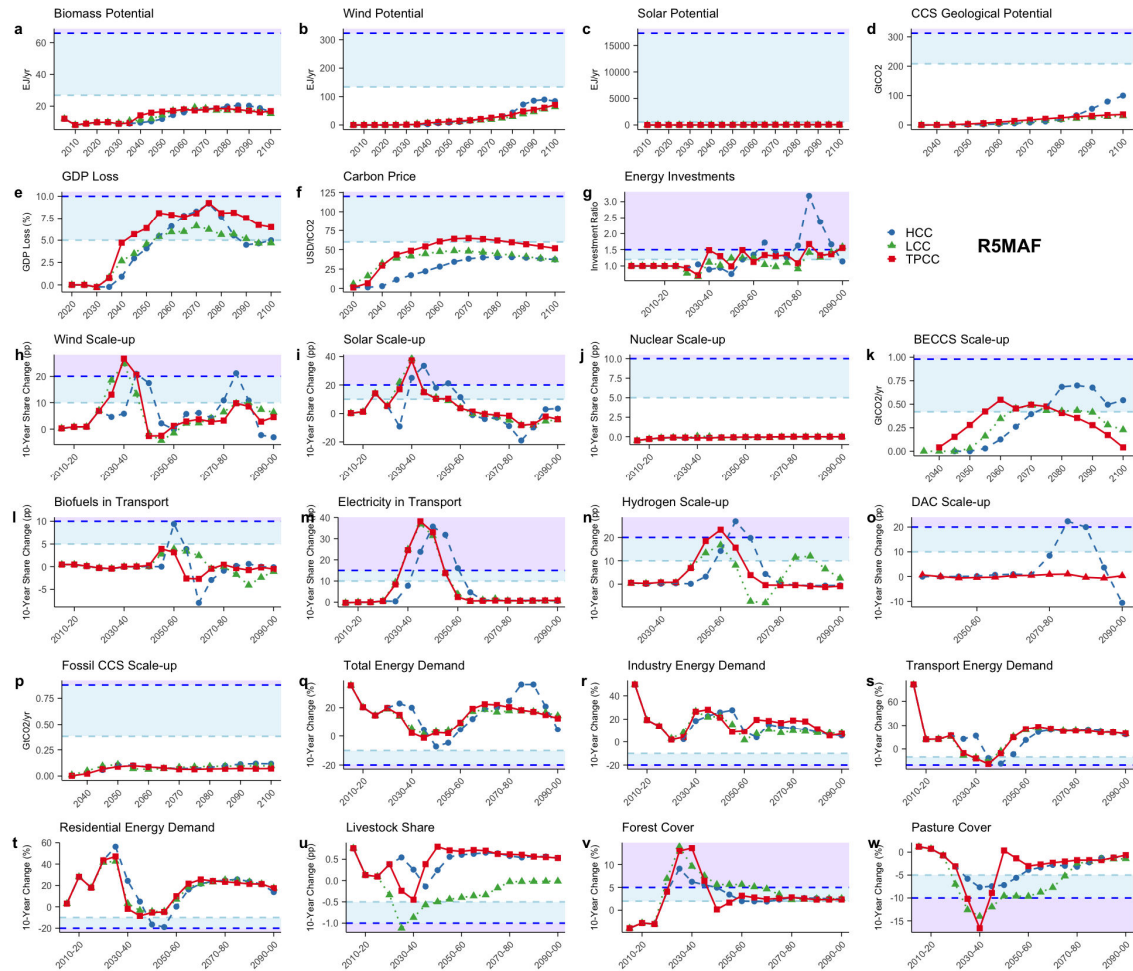

Supplementary Figure 9 Feasibility challenges assessment across all indicators for R5MAF (Middle East and Africa) region. Each panel represents the following indicators: Biomass/Wind/Solar/CCS (a–d); GDP loss (e); Carbon price (f); Energy investments (g); Wind/Solar/Wind/BECCS/Fossil CCS scale-up (h–l); Biofuels/Electricity in transport scale-up (m,n); Hydrogen/DAC scale-up (o,p); Decline in total/transport/industry/residential energy demand (q–t); Decline of livestock share in food demand (u); Forest cover increase (v); and Pasture cover decrease (w). Light blue and purple shaded ranges indicate medium and high levels of feasibility concern, respectively.



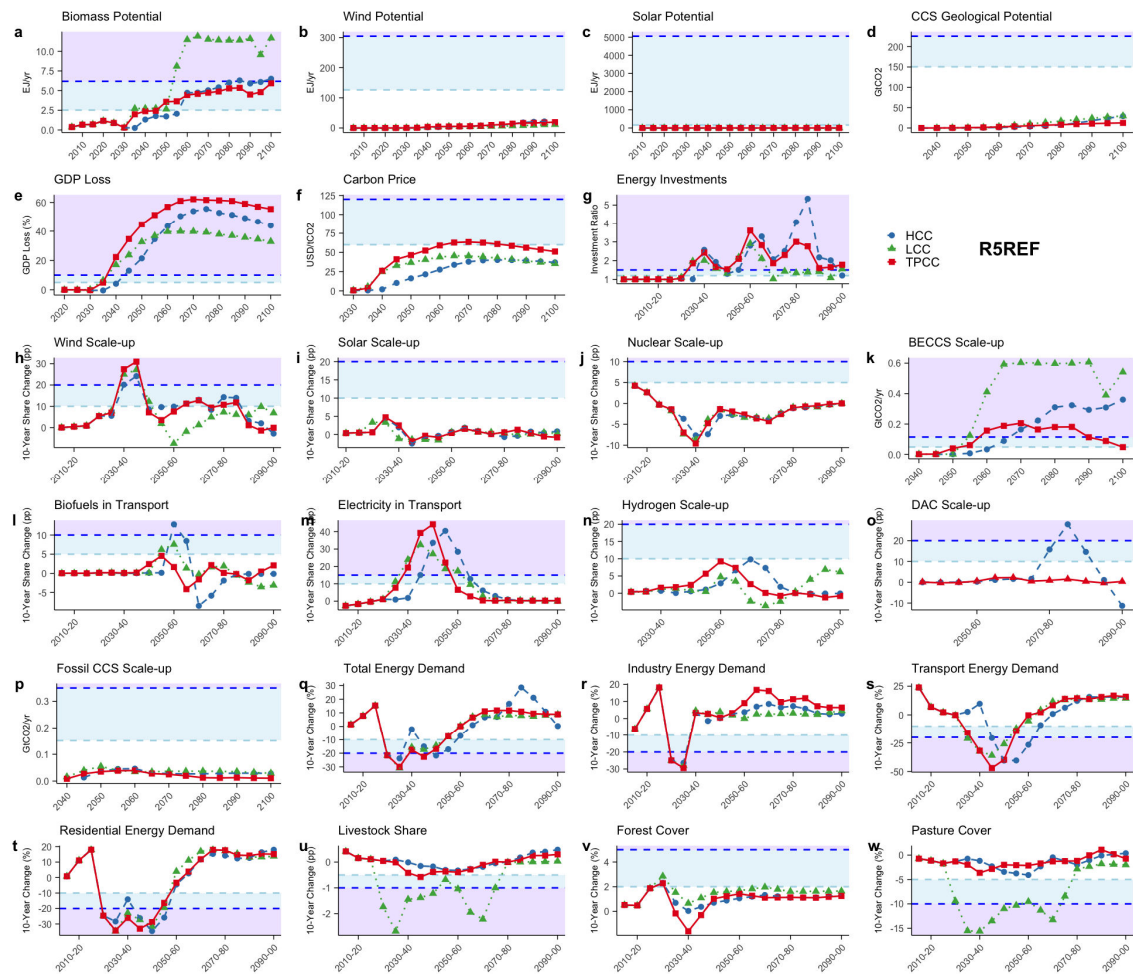

Supplementary Figure 10 Feasibility challenges assessment across all indicators for R5REF (reforming economy) region. Each panel represents the following indicators: Biomass/Wind/Solar/CCS (a–d); GDP loss (e); Carbon price (f); Energy investments (g); Wind/Solar/Wind/BECCS/Fossil CCS scale-up (h–l); Biofuels/Electricity in transport scale-up (m,n); Hydrogen/DAC scale-up (o,p); Decline in total/transport/industry/residential energy demand (q–t); Decline of livestock share in food demand (u); Forest cover increase (v); and Pasture cover decrease (w). Light blue and purple shaded ranges indicate medium and high levels of feasibility concern, respectively.

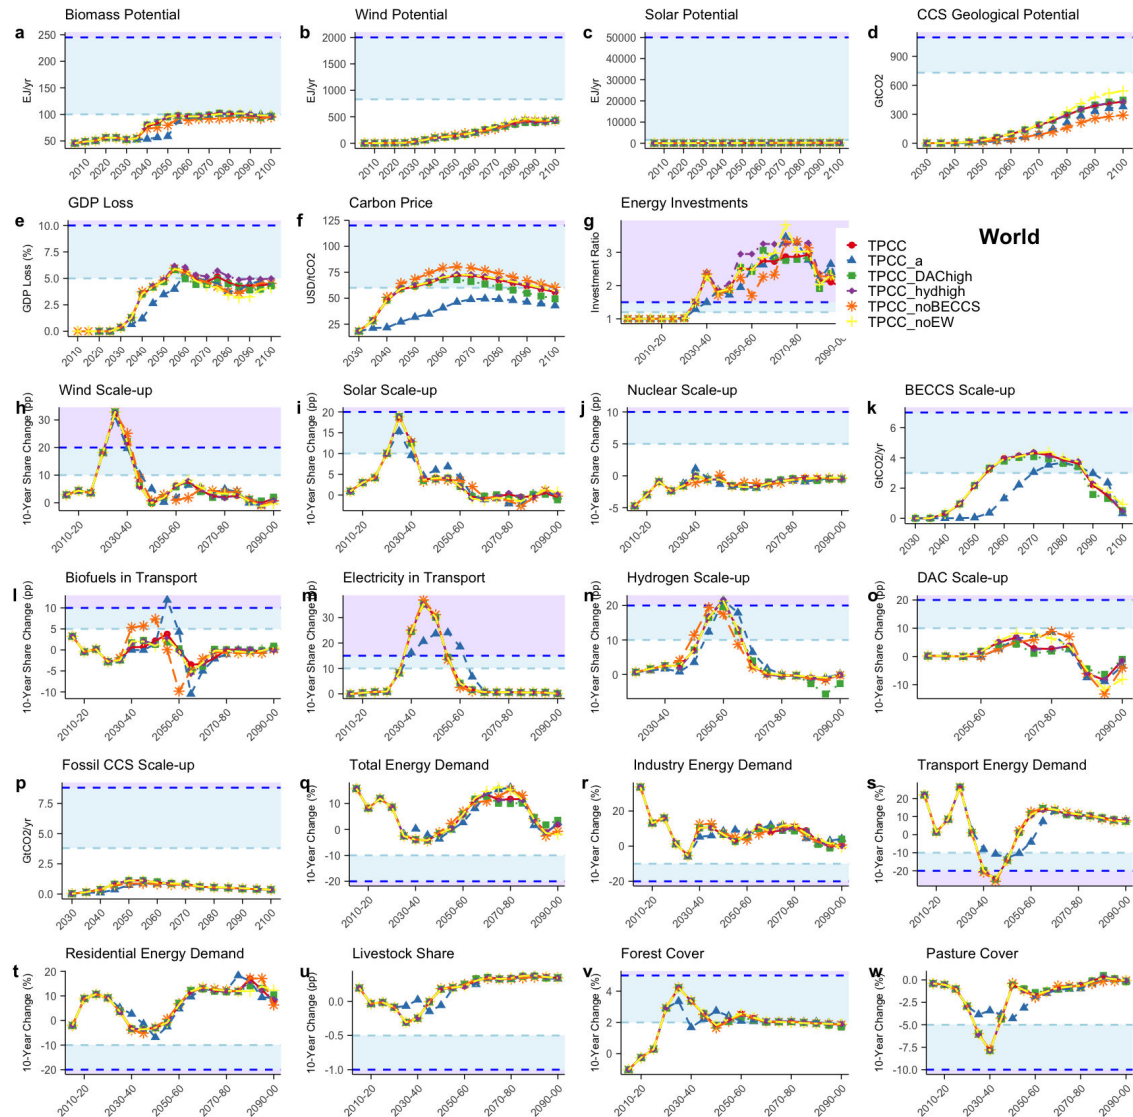

**Supplementary Figure 11 Feasibility assessment using sensitivity analysis scenarios. The indicators and its criteria of feasibility challenge are same as the main assessment (See method)**

Each panel represents the following indicators: Biomass/Wind/Solar/CCS (a–d); GDP loss (e); Carbon price (f); Energy investments (g); Wind/Solar/Wind/BECCS/Fossil CCS scale-up (h–l); Biofuels/Electricity in transport scale-up (m,n); Hydrogen/DAC scale-up (o,p); Decline in total/transport/industry/residential energy demand (q–t); Decline of livestock share in food demand (u); Forest cover increase (v); and Pasture cover decrease (w). Light blue and purple shaded ranges indicate medium and high levels of feasibility concern, respectively.

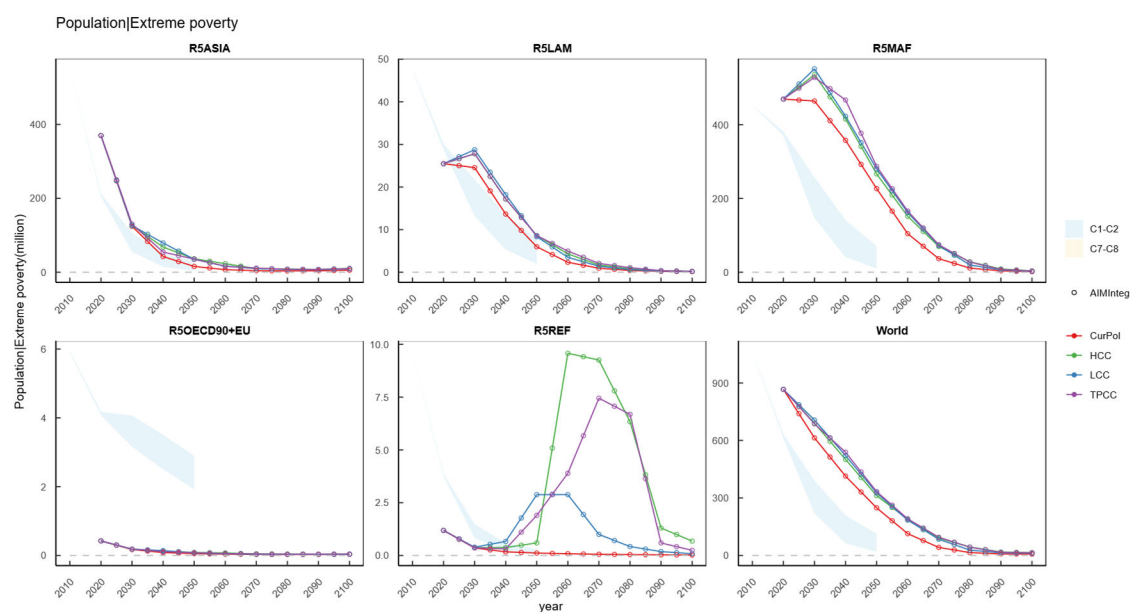

Supplementary Figure 12 Poverty headcount by aggregated regions

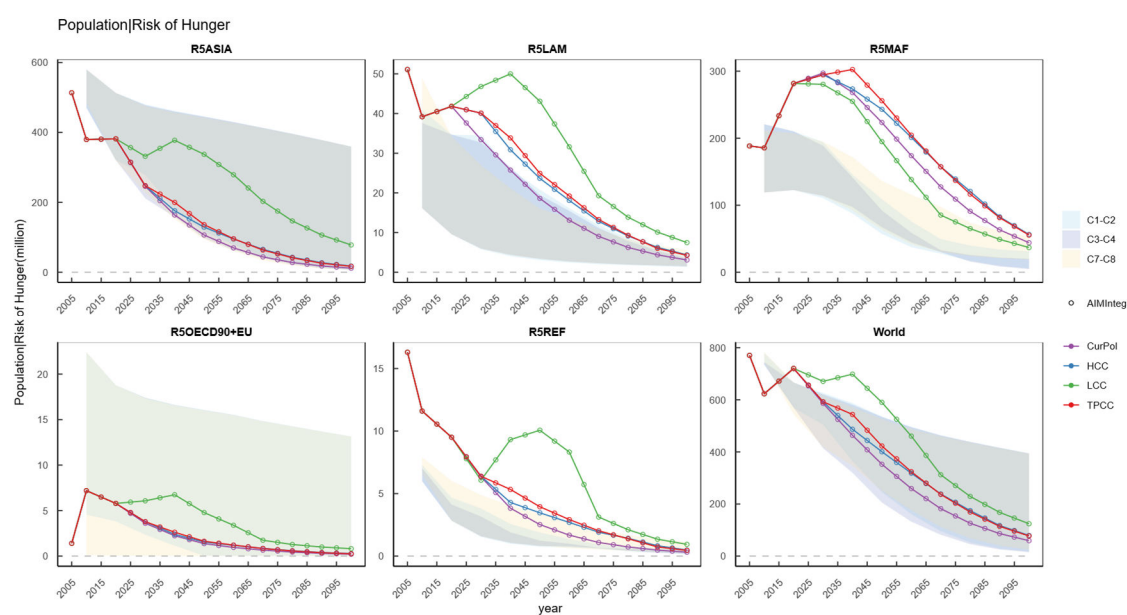

Supplementary Figure 13 Population at risk of hunger by aggregated regions



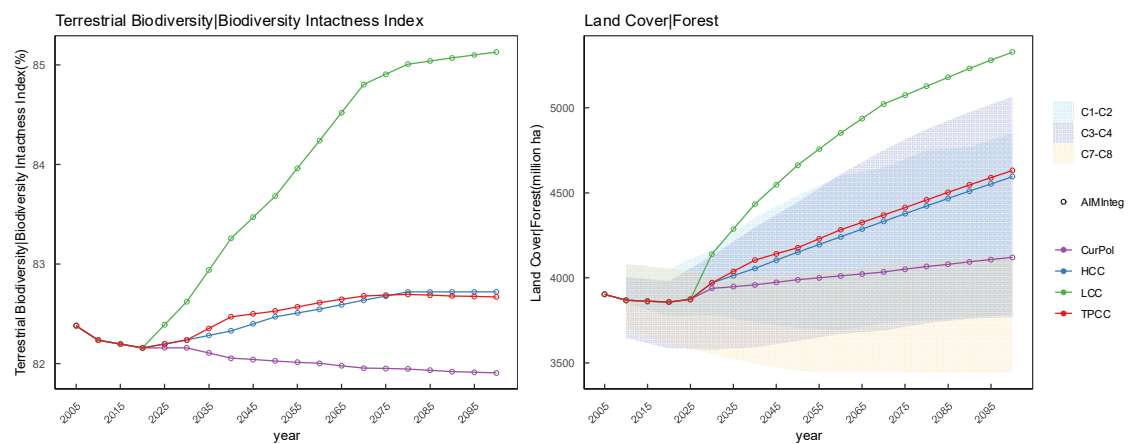

**Supplementary Figure 14 Biodiversity index using BII and forest area.**

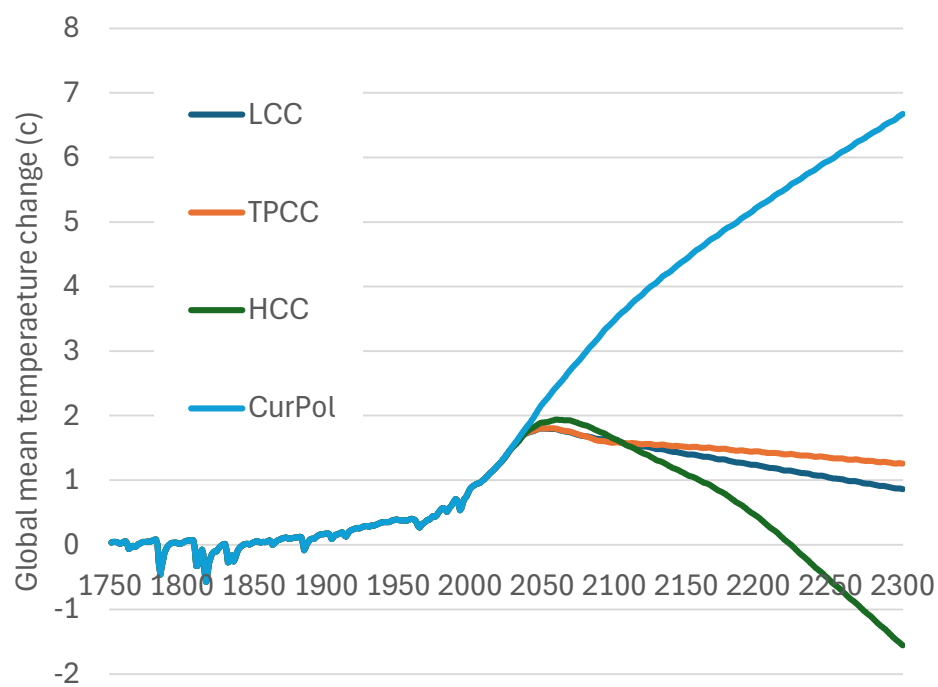

**Supplementary Figure 15** Global mean temperature changes from preindustrial level. The emissions after 2100 is assumed to be constant as in 2100.

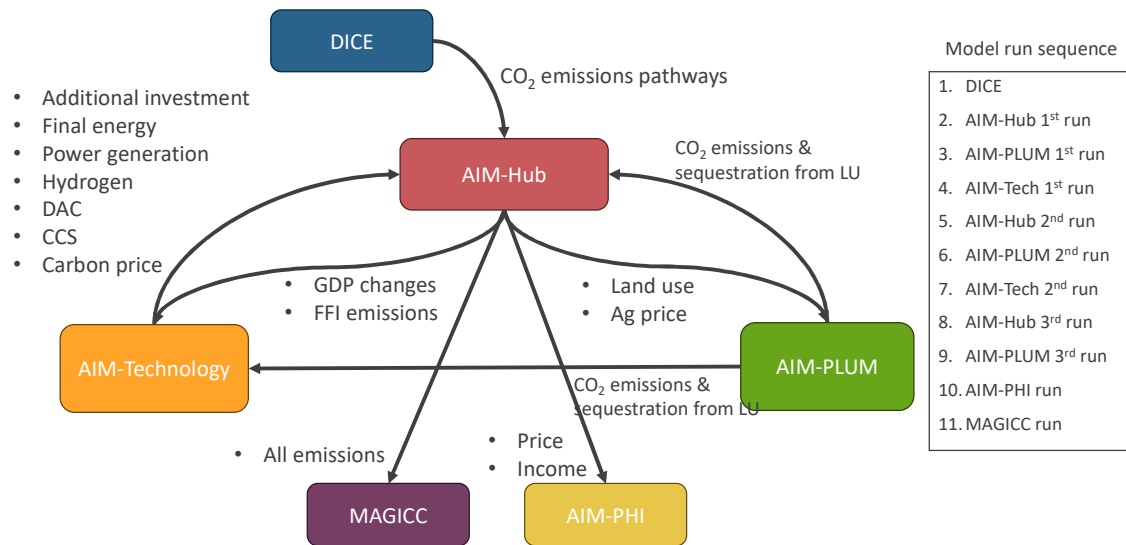

Supplementary Figure 16 Modeling framework

## Supplementary Tables

Supplementary Table 1 List of indicators that are used for feasibility assessment

|                | Indicators                                                 | Computation                                                                                                                     | Medium                                 | High                                   | Source                                                                                                          |
|----------------|------------------------------------------------------------|---------------------------------------------------------------------------------------------------------------------------------|----------------------------------------|----------------------------------------|-----------------------------------------------------------------------------------------------------------------|
| Geophysical    | Biomass potential                                          | Total primary energy generation from biomass in a given year                                                                    | 100 EJ yr <sup>-1</sup>                | 245 EJ yr <sup>-1</sup>                | Frank et al. (2021) <sup>5</sup> ; Creutzig et al. (2015) <sup>6</sup>                                          |
|                | Wind potential                                             | Total secondary energy generation from wind in a given year                                                                     | 830 EJ yr <sup>-1</sup>                | 2000 EJ yr <sup>-1</sup>               | Deng et al. (2015) <sup>7</sup> ; Eurek et al. (2017) <sup>8</sup>                                              |
|                | Solar potential                                            | Total primary energy generation from solar in a given year                                                                      | 1600 EJ yr <sup>-1</sup>               | 50 000 EJ yr <sup>-1</sup>             | Rogner et al. (2012) <sup>9</sup> ; Moomaw et al. (2011) <sup>10</sup>                                          |
|                | CCS geological potential                                   | Cumulative CCS volume                                                                                                           | 730GtCO <sub>2</sub>                   | 1095GtCO <sub>2</sub>                  | Gidden et al.(2025) <sup>11</sup>                                                                               |
| Economic       | GDP loss                                                   | Decadal percentage difference in GDP in mitigation vs baseline scenario                                                         | 5%                                     | 10%                                    | Analogy to current COVID-19 spending Andrijevic et al. (2020c) <sup>12</sup>                                    |
|                | Carbon price                                               | Carbon price levels (NPV) and decadal increases                                                                                 | USD60                                  | USD120 and 5×                          | Brutschin et al. (2021) <sup>3</sup> ; OECD (2021) <sup>13</sup>                                                |
|                | Energy investments                                         | Ratio between investments in mitigation vs baseline in a given decade                                                           | 1.2                                    | 1.5                                    | McCollum et al. (2018) <sup>14</sup>                                                                            |
| Technological  | Wind/solar scale-up                                        | Decadal percentage point increase in the wind/ solar share in electricity generation                                            | 10 pp                                  | 20 pp                                  | Brutschin et al. (2021) <sup>3</sup> ; Wilson et al. (2020) <sup>15</sup>                                       |
|                | Nuclear scale-up                                           | Decadal percentage point increase in the nuclear share in electricity generation                                                | 5 pp                                   | 10 pp                                  | Brutschin et al. (2021) <sup>3</sup> ; Markard et al. (2020) <sup>16</sup> ; Wilson et al. (2020) <sup>15</sup> |
|                | BECCS scale-up                                             | Amount of CO <sub>2</sub> captured in a given year                                                                              | 3 GtCO <sub>2</sub> yr <sup>-1</sup>   | 7 GtCO <sub>2</sub> yr <sup>-1</sup>   | Warszawski et al. (2021) <sup>17</sup>                                                                          |
|                | Fossil CCS scale-up                                        | Amount of CO <sub>2</sub> captured in a given year                                                                              | 3.8 GtCO <sub>2</sub> yr <sup>-1</sup> | 8.8 GtCO <sub>2</sub> yr <sup>-1</sup> | Budinis et al. (2018) <sup>18</sup>                                                                             |
|                | Biofuels in transport scale-up                             | Decadal percentage point increase in the share of biofuels in the final energy demand of the transport sector                   | 5 pp                                   | 10 pp                                  | Nogueira et al. (2020) <sup>19</sup>                                                                            |
|                | Electricity in transport scale-up                          | Decadal percentage point increase in the share of electricity in the final energy demand of the transport sector                | 10 pp                                  | 15 pp                                  | Muratori et al. (2021) <sup>20</sup>                                                                            |
|                | Hydrogen scale-up                                          | Decadal percentage point increase in the share of electricity input for hydrogen generation in the total electricity generation | 10 pp                                  | 20 pp                                  | Based on solar/wind scale-up                                                                                    |
|                | DAC scale-up                                               | Decadal percentage point increase in the share of electricity input for DAC in the total electricity generation                 | 10 pp                                  | 20 pp                                  | Based on solar/wind scale-up                                                                                    |
| Socio-cultural | Total/transport/industry/residential energy demand decline | Decadal percentage decrease in demand                                                                                           | 10 %                                   | 20 %                                   | Grubler et al. (2018) <sup>21</sup>                                                                             |
|                | Decline of livestock share in food demand                  | Decadal percentage decrease in the livestock share in total food demand                                                         | 0.5 pp                                 | 1 pp                                   | Grubler et al. (2018) <sup>21</sup> ; Bajželj et al. (2014) <sup>22</sup>                                       |
|                | Forest cover increase                                      | Decadal percentage increase in forest cover                                                                                     | 2 %                                    | 5 %                                    | Brutschin et al. (2021) <sup>3</sup>                                                                            |
|                | Pasture cover decrease                                     | Decadal percentage decrease in pasture cover                                                                                    | 5 %                                    | 10 %                                   | Brutschin et al. (2021) <sup>3</sup>                                                                            |

## References

1. Babiker M, Berndes G, Blok K, Cohen B, Cowie A, Geden O, *et al.* Cross-sectoral perspectives (chapter 12). Cambridge, UK and New York, NY, USA: Cambridge University Press; 2022.
2. Schleussner C-F, Ganti G, Lejeune Q, Zhu B, Pfleiderer P, Prütz R, *et al.* Overconfidence in climate overshoot. *Nature* 2024, **634**(8033): 366-373.
3. Brutschin E, Pianta S, Tavoni M, Riahi K, Bosetti V, Marangoni G, *et al.* A multidimensional

- feasibility evaluation of low-carbon scenarios. *Environmental Research Letters* 2021, **16**(6): 064069.
4. Riahi K, Schaeffer R, Arango J, Calvin K, Guivarch C, Hasegawa T, *et al.* Mitigation pathways compatible with long-term goals. Cambridge, UK and New York, NY, USA: Cambridge University Press; 2022. Report No.: doi: 10.1017/9781009157926.005.
  5. Frank S, Gusti M, Havlík P, Lauri P, DiFulvio F, Forsell N, *et al.* Land-based climate change mitigation potentials within the agenda for sustainable development. *Environmental Research Letters* 2021, **16**(2): 024006.
  6. Creutzig F, Ravindranath NH, Berndes G, Bolwig S, Bright R, Cherubini F, *et al.* Bioenergy and climate change mitigation: an assessment. *GCB Bioenergy* 2015, **7**(5): 916-944.
  7. Deng YY, Haigh M, Pouwels W, Ramaekers L, Brandsma R, Schimschar S, *et al.* Quantifying a realistic, worldwide wind and solar electricity supply. *Global Environmental Change* 2015, **31**: 239-252.
  8. Eurek K, Sullivan P, Gleason M, Hettinger D, Heimiller D, Lopez A. An improved global wind resource estimate for integrated assessment models. *Energy Economics* 2017, **64**: 552-567.
  9. Rogner H-H, Aguilera RF, Bertani R, Bhattacharya C, Dusseault MB, Gagnon L, *et al.* Energy resources and potentials. 2012.
  10. Moomaw W, Yamba F, Kamimoto M, Maurice L, Nyboer J, Urama K, *et al.* Introduction. In: Edenhofer O, Pichs-Madruga R, Sokona Y, Seyboth K, Matschoss P, Kadner S, *et al.* (eds). *IPCC Special Report on Renewable Energy Sources and Climate Change Mitigation*. Cambridge University Press: Cambridge, United Kingdom and New York, NY, USA, 2011.
  11. Gidden MJ, Joshi S, Armitage JJ, Christ A-B, Boettcher M, Brutschin E, *et al.* A prudent planetary limit for geologic carbon storage. *Nature* 2025, **645**(8079): 124-132.
  12. Andrijevic M, Crespo Cuaresma J, Lissner T, Thomas A, Schleussner C-F. Overcoming gender inequality for climate resilient development. *Nature Communications* 2020, **11**(1): 6261.
  13. Organisation for Economic C-o, Development. *Effective Carbon Rates 2021*. OECD Publishing: Paris, France, 2021.
  14. McCollum DL, Zhou W, Bertram C, de Boer H-S, Bosetti V, Busch S, *et al.* Energy investment needs for fulfilling the Paris Agreement and achieving the Sustainable Development Goals. *Nature Energy* 2018, **3**(7): 589-599.
  15. Wilson C, Grubler A, Bento N, Healey S, De Stercke S, Zimm C. Granular technologies to accelerate decarbonization. *Science* 2020, **368**(6486): 36-39.
  16. Markard J, Bento N, Kittner N, Nuñez-Jimenez A. Destined for decline? Examining nuclear energy from a technological innovation systems perspective. *Energy Research & Social Science* 2020, **67**: 101512.
  17. Warszawski L, Kriegler E, Lenton TM, Gaffney O, Jacob D, Klingensfeld D, *et al.* All options,

not silver bullets, needed to limit global warming to 1.5 °C: a scenario appraisal. *Environmental Research Letters* 2021, **16**(6): 064037.

18. Budinis S, Krevor S, Dowell NM, Brandon N, Hawkes A. An assessment of CCS costs, barriers and potential. *Energy Strategy Reviews* 2018, **22**: 61-81.
19. Nogueira LAH, Souza GM, Cortez LAB, Brito Cruz CHd. 9 - Biofuels for Transport. In: Letcher TM (ed). *Future Energy (Third Edition)*. Elsevier, 2020, pp 173-197.
20. Muratori M, Alexander M, Arent D, Bazilian M, Cazzola P, Dede EM, *et al.* The rise of electric vehicles—2020 status and future expectations. *Progress in Energy* 2021, **3**(2): 022002.
21. Grubler A, Wilson C, Bento N, Boza-Kiss B, Krey V, McCollum DL, *et al.* A low energy demand scenario for meeting the 1.5 °C target and sustainable development goals without negative emission technologies. *Nature Energy* 2018, **3**(6): 515-527.
22. Bajželj B, Richards KS, Allwood JM, Smith P, Dennis JS, Curmi E, *et al.* Importance of food-demand management for climate mitigation. *Nature climate change* 2014, **4**(10): 924-929.

Supplementary Table 2 Aggregated regional classifications and AIM-Hub native regions.

| Native Region |                             | R5 classification | Developed/<br>developing |
|---------------|-----------------------------|-------------------|--------------------------|
| Code          | Native Region Name          |                   |                          |
| USA           | USA                         | R5OECD90+EU       | Developed                |
| XE25          | EU                          | R5OECD90+EU       | Developed                |
| XER           | Rest of Europe              | R5OECD90+EU       | Developed                |
| TUR           | Turkey                      | R5OECD90+EU       | Developed                |
| XOC           | New Zealand and Australia   | R5OECD90+EU       | Developed                |
| CHN           | China                       | R5ASIA            | Developing               |
| IND           | India                       | R5ASIA            | Developing               |
| JPN           | Japan                       | R5OECD90+EU       | Developed                |
|               | Rest of East and South East |                   | Developing               |
| XSE           | Asia                        | R5ASIA            |                          |
| XSA           | Rest of Asia                | R5ASIA            | Developing               |
| CAN           | Canada                      | R5OECD90+EU       | Developed                |
| BRA           | Brazil                      | R5LAM             | Developing               |
| XLM           | Rest of Latin America       | R5LAM             | Developing               |
| CIS           | Former USSR                 | R5REF             | Developing               |
| XME           | Middle East                 | R5MAF             | Developing               |
| XNF           | North Africa                | R5MAF             | Developing               |
| XAF           | Other Africa                | R5MAF             | Developing               |

Supplementary Table 3 AIM-Hub native region definitions.

| Native Region Name        | AIM region code | ISO Code | Country                         |
|---------------------------|-----------------|----------|---------------------------------|
| Rest of Latin America     | XLM             | ABW      | Aruba                           |
| Rest of Asia              | XSA             | AFG      | Afghanistan                     |
| Other Africa              | XAF             | AGO      | Angola                          |
| Rest of Latin America     | XLM             | AIA      | Anguilla                        |
| Rest of Europe            | XER             | ALB      | Albania                         |
| Rest of Europe            | XER             | AND      | Andorra                         |
| Rest of Latin America     | XLM             | ANT      | Netherlands Antilles            |
| Middle East               | XME             | ARE      | United Arab Emirates            |
| Rest of Latin America     | XLM             | ARG      | Argentina                       |
| Former USSR               | CIS             | ARM      | Armenia                         |
| Rest of Asia              | XSA             | ASM      | American Samoa                  |
| Rest of Asia              | XSA             | ATF      | French Southern Territories     |
| Rest of Latin America     | XLM             | ATG      | Antigua and Barbuda             |
| New Zealand and Australia | XOC             | AUS      | Australia                       |
| EU                        | XE25            | AUT      | Austria                         |
| Former USSR               | CIS             | AZE      | Azerbaijan                      |
| Other Africa              | XAF             | BDI      | Burundi                         |
| EU                        | XE25            | BEL      | Belgium                         |
| Other Africa              | XAF             | BEN      | Benin                           |
| Other Africa              | XAF             | BFA      | Burkina Faso                    |
| Rest of Asia              | XSA             | BGD      | Bangladesh                      |
| Rest of Europe            | XER             | BGR      | Bulgaria                        |
| Middle East               | XME             | BHR      | Bahrain                         |
| Rest of Latin America     | XLM             | BHS      | Bahamas                         |
| Rest of Europe            | XER             | BIH      | Bosnia and Herzegovina          |
| Former USSR               | CIS             | BLR      | Belarus                         |
| Rest of Latin America     | XLM             | BLZ      | Belize                          |
| Rest of Latin America     | XLM             | BMU      | Bermuda                         |
| Rest of Latin America     | XLM             | BOL      | Bolivia, Plurinational State of |
| Brazil                    | BRA             | BRA      | Brazil                          |
| Rest of Latin America     | XLM             | BRB      | Barbados                        |



|                       |      |     |                                       |
|-----------------------|------|-----|---------------------------------------|
| Rest of Asia          | XSA  | BRN | Brunei Darussalam                     |
| Rest of Asia          | XSA  | BTN | Bhutan                                |
| Rest of Latin America | XLM  | BVT | Bouvet Island                         |
| Other Africa          | XAF  | BWA | Botswana                              |
| Other Africa          | XAF  | CAF | Central African Republic              |
| Canada                | CAN  | CAN | Canada                                |
| Rest of Asia          | XSA  | CCK | Cocos (Keeling) Islands               |
| Rest of Europe        | XER  | CHE | Switzerland                           |
| Rest of Latin America | XLM  | CHL | Chile                                 |
| China                 | CHN  | CHN | China                                 |
| Other Africa          | XAF  | CIV | Côte d'Ivoire                         |
| Other Africa          | XAF  | CMR | Cameroon                              |
| Other Africa          | XAF  | COD | Congo, the Democratic Republic of the |
| Other Africa          | XAF  | COG | Congo                                 |
| Rest of Asia          | XSA  | COK | Cook Islands                          |
| Rest of Latin America | XLM  | COL | Colombia                              |
| Other Africa          | XAF  | COM | Comoros                               |
| Other Africa          | XAF  | CPV | Cape Verde                            |
| Rest of Latin America | XLM  | CRI | Costa Rica                            |
| Rest of Latin America | XLM  | CUB | Cuba                                  |
| Rest of Asia          | XSA  | CXR | Christmas Island                      |
| Rest of Latin America | XLM  | CYM | Cayman Islands                        |
| EU                    | XE25 | CYP | Cyprus                                |
| EU                    | XE25 | CZE | Czech Republic                        |
| EU                    | XE25 | DEU | Germany                               |
| Other Africa          | XAF  | DJI | Djibouti                              |
| Rest of Latin America | XLM  | DMA | Dominica                              |
| EU                    | XE25 | DNK | Denmark                               |
| Rest of Latin America | XLM  | DOM | Dominican Republic                    |
| North Africa          | XNF  | DZA | Algeria                               |
| Rest of Latin America | XLM  | ECU | Ecuador                               |
| North Africa          | XNF  | EGY | Egypt                                 |
| Other Africa          | XAF  | ERI | Eritrea                               |
| Other Africa          | XAF  | ESH | Western Sahara                        |

|                                  |      |     |                                   |
|----------------------------------|------|-----|-----------------------------------|
| EU                               | XE25 | ESP | Spain                             |
| EU                               | XE25 | EST | Estonia                           |
| Other Africa                     | XAF  | ETH | Ethiopia                          |
| EU                               | XE25 | FIN | Finland                           |
| Rest of Asia                     | XSA  | FJI | Fiji                              |
| Rest of Latin America            | XLM  | FLK | Falkland Islands (Malvinas)       |
| EU                               | XE25 | FRA | France                            |
| Rest of Europe                   | XER  | FRO | Faroe Islands                     |
| Rest of Asia                     | XSA  | FSM | Micronesia, Federated States of   |
| Other Africa                     | XAF  | GAB | Gabon                             |
| EU                               | XE25 | GBR | United Kingdom                    |
| Former USSR                      | CIS  | GEO | Georgia                           |
| Other Africa                     | XAF  | GHA | Ghana                             |
| Rest of Europe                   | XER  | GIB | Gibraltar                         |
| Other Africa                     | XAF  | GIN | Guinea                            |
| Rest of Latin America            | XLM  | GLP | Guadeloupe                        |
| Other Africa                     | XAF  | GMB | Gambia                            |
| Other Africa                     | XAF  | GNB | Guinea-Bissau                     |
| Other Africa                     | XAF  | GNQ | Equatorial Guinea                 |
| EU                               | XE25 | GRC | Greece                            |
| Rest of Latin America            | XLM  | GRD | Grenada                           |
| Rest of Latin America            | XLM  | GRL | Greenland                         |
| Rest of Latin America            | XLM  | GTM | Guatemala                         |
| Rest of Latin America            | XLM  | GUF | French Guiana                     |
| Rest of Asia                     | XSA  | GUM | Guam                              |
| Rest of Latin America            | XLM  | GUY | Guyana                            |
| China                            | CHN  | HKG | Hong Kong                         |
| Rest of Asia                     | XSA  | HMD | Heard Island and McDonald Islands |
| Rest of Latin America            | XLM  | HND | Honduras                          |
| Rest of Europe                   | XER  | HRV | Croatia                           |
| Rest of Latin America            | XLM  | HTI | Haiti                             |
| EU                               | XE25 | HUN | Hungary                           |
| Rest of East and South East Asia | XSE  | IDN | Indonesia                         |
| India                            | IND  | IND | India                             |

|                                  |      |     |                                  |
|----------------------------------|------|-----|----------------------------------|
| Rest of Asia                     | XSA  | IOT | British Indian Ocean Territory   |
| EU                               | XE25 | IRL | Ireland                          |
| Middle East                      | XME  | IRN | Iran, Islamic Republic of        |
| Middle East                      | XME  | IRQ | Iraq                             |
| Rest of Europe                   | XER  | ISL | Iceland                          |
| Middle East                      | XME  | ISR | Israel                           |
| EU                               | XE25 | ITA | Italy                            |
| Rest of Latin America            | XLM  | JAM | Jamaica                          |
| Middle East                      | XME  | JOR | Jordan                           |
| Japan                            | JPN  | JPN | Japan                            |
| Former USSR                      | CIS  | KAZ | Kazakhstan                       |
| Other Africa                     | XAF  | KEN | Kenya                            |
| Former USSR                      | CIS  | KGZ | Kyrgyzstan                       |
| Rest of East and South East Asia | XSE  | KHM | Cambodia                         |
| Rest of Asia                     | XSA  | KIR | Kiribati                         |
| Rest of Latin America            | XLM  | KNA | Saint Kitts and Nevis            |
| Rest of East and South East Asia | XSE  | KOR | Korea, Republic of               |
| Middle East                      | XME  | KWT | Kuwait                           |
| Rest of East and South East Asia | XSE  | LAO | Lao People's Democratic Republic |
| Middle East                      | XME  | LBN | Lebanon                          |
| Other Africa                     | XAF  | LBR | Liberia                          |
| North Africa                     | XNF  | LBY | Libyan Arab Jamahiriya           |
| Rest of Latin America            | XLM  | LCA | Saint Lucia                      |
| Rest of Europe                   | XER  | LIE | Liechtenstein                    |
| Rest of Asia                     | XSA  | LKA | Sri Lanka                        |
| Other Africa                     | XAF  | LSO | Lesotho                          |
| EU                               | XE25 | LTU | Lithuania                        |
| EU                               | XE25 | LUX | Luxembourg                       |
| EU                               | XE25 | LVA | Latvia                           |
| North Africa                     | XNF  | MAR | Morocco                          |
| Rest of Europe                   | XER  | MCO | Monaco                           |
| Former USSR                      | CIS  | MDA | Moldova, Republic of             |
| Other Africa                     | XAF  | MDG | Madagascar                       |
| Rest of Asia                     | XSA  | MDV | Maldives                         |

|                                  |      |     |                                            |
|----------------------------------|------|-----|--------------------------------------------|
| Rest of Latin America            | XLM  | MEX | Mexico                                     |
| Rest of Asia                     | XSA  | MHL | Marshall Islands                           |
| Rest of Europe                   | XER  | MKD | Macedonia, the former Yugoslav Republic of |
| Other Africa                     | XAF  | MLI | Mali                                       |
| EU                               | XE25 | MLT | Malta                                      |
| Rest of East and South East Asia | XSE  | MMR | Myanmar                                    |
| Rest of Europe                   | XER  | MNE | Montenegro                                 |
| Rest of East and South East Asia | XSE  | MNG | Mongolia                                   |
| Rest of Asia                     | XSA  | MNP | Northern Mariana Islands                   |
| Other Africa                     | XAF  | MOZ | Mozambique                                 |
| Other Africa                     | XAF  | MRT | Mauritania                                 |
| Rest of Latin America            | XLM  | MSR | Montserrat                                 |
| Rest of Latin America            | XLM  | MTQ | Martinique                                 |
| Other Africa                     | XAF  | MUS | Mauritius                                  |
| Other Africa                     | XAF  | MWI | Malawi                                     |
| Rest of East and South East Asia | XSE  | MYS | Malaysia                                   |
| Other Africa                     | XAF  | MYT | Mayotte                                    |
| Other Africa                     | XAF  | NAM | Namibia                                    |
| Rest of Asia                     | XSA  | NCL | New Caledonia                              |
| Other Africa                     | XAF  | NER | Niger                                      |
| Rest of Asia                     | XSA  | NFK | Norfolk Island                             |
| Other Africa                     | XAF  | NGA | Nigeria                                    |
| Rest of Latin America            | XLM  | NIC | Nicaragua                                  |
| Rest of Asia                     | XSA  | NIU | Niue                                       |
| EU                               | XE25 | NLD | Netherlands                                |
| Rest of Europe                   | XER  | NOR | Norway                                     |
| Rest of Asia                     | XSA  | NPL | Nepal                                      |
| Rest of Asia                     | XSA  | NRU | Nauru                                      |
| New Zealand and Australia        | XOC  | NZL | New Zealand                                |
| Middle East                      | XME  | OMN | Oman                                       |
| Rest of Asia                     | XSA  | PAK | Pakistan                                   |
| Rest of Latin America            | XLM  | PAN | Panama                                     |
| Rest of Asia                     | XSA  | PCN | Pitcairn                                   |

|                                  |      |     |                                              |
|----------------------------------|------|-----|----------------------------------------------|
| Rest of Latin America            | XLM  | PER | Peru                                         |
| Rest of East and South East Asia | XSE  | PHL | Philippines                                  |
| Rest of Asia                     | XSA  | PLW | Palau                                        |
| Rest of Asia                     | XSA  | PNG | Papua New Guinea                             |
| EU                               | XE25 | POL | Poland                                       |
| Rest of Latin America            | XLM  | PRI | Puerto Rico                                  |
| Rest of East and South East Asia | XSE  | PRK | Korea, Democratic People's Republic of       |
| EU                               | XE25 | PRT | Portugal                                     |
| Rest of Latin America            | XLM  | PRY | Paraguay                                     |
| Rest of Asia                     | XSA  | PYF | French Polynesia                             |
| Middle East                      | XME  | QAT | Qatar                                        |
| Other Africa                     | XAF  | REU | Réunion                                      |
| Rest of Europe                   | XER  | ROU | Romania                                      |
| Former USSR                      | CIS  | RUS | Russian Federation                           |
| Other Africa                     | XAF  | RWA | Rwanda                                       |
| Middle East                      | XME  | SAU | Saudi Arabia                                 |
| Other Africa                     | XAF  | SDN | Sudan                                        |
| Other Africa                     | XAF  | SEN | Senegal                                      |
| Rest of East and South East Asia | XSE  | SGP | Singapore                                    |
| Rest of Latin America            | XLM  | SGS | South Georgia and the South Sandwich Islands |
| Other Africa                     | XAF  | SHN | Saint Helena, Ascension and Tristan da Cunha |
| Rest of Europe                   | XER  | SJM | Svalbard and Jan Mayen                       |
| Rest of Asia                     | XSA  | SLB | Solomon Islands                              |
| Other Africa                     | XAF  | SLE | Sierra Leone                                 |
| Rest of Latin America            | XLM  | SLV | El Salvador                                  |
| Rest of Europe                   | XER  | SMR | San Marino                                   |
| Other Africa                     | XAF  | SOM | Somalia                                      |
| Rest of Latin America            | XLM  | SPM | Saint Pierre and Miquelon                    |
| Rest of Europe                   | XER  | SRB | Serbia                                       |
| Other Africa                     | XAF  | STP | Sao Tome and Principe                        |
| Rest of Latin America            | XLM  | SUR | Suriname                                     |
| EU                               | XE25 | SVK | Slovakia                                     |

|                                  |      |     |                                      |
|----------------------------------|------|-----|--------------------------------------|
| EU                               | XE25 | SVN | Slovenia                             |
| EU                               | XE25 | SWE | Sweden                               |
| Other Africa                     | XAF  | SWZ | Swaziland                            |
| Other Africa                     | XAF  | SYC | Seychelles                           |
| Middle East                      | XME  | SYR | Syrian Arab Republic                 |
| Rest of Latin America            | XLM  | TCA | Turks and Caicos Islands             |
| Other Africa                     | XAF  | TCD | Chad                                 |
| Other Africa                     | XAF  | TGO | Togo                                 |
| Rest of East and South East Asia | XSE  | THA | Thailand                             |
| Former USSR                      | CIS  | TJK | Tajikistan                           |
| Rest of Asia                     | XSA  | TKL | Tokelau                              |
| Former USSR                      | CIS  | TKM | Turkmenistan                         |
| Rest of East and South East Asia | XSE  | TLS | Timor-Leste                          |
| Rest of Asia                     | XSA  | TON | Tonga                                |
| Rest of Latin America            | XLM  | TTO | Trinidad and Tobago                  |
| North Africa                     | XNF  | TUN | Tunisia                              |
| Turkey                           | TUR  | TUR | Turkey                               |
| Rest of Asia                     | XSA  | TUV | Tuvalu                               |
| Rest of East and South East Asia | XSE  | TWN | Taiwan                               |
| Other Africa                     | XAF  | TZA | Tanzania, United Republic of         |
| Other Africa                     | XAF  | UGA | Uganda                               |
| Former USSR                      | CIS  | UKR | Ukraine                              |
| Rest of Asia                     | XSA  | UMI | United States Minor Outlying Islands |
| Rest of Latin America            | XLM  | URY | Uruguay                              |
| USA                              | USA  | USA | United States                        |
| Former USSR                      | CIS  | UZB | Uzbekistan                           |
| Rest of Europe                   | XER  | VAT | Holy See (Vatican City State)        |
| Rest of Latin America            | XLM  | VCT | Saint Vincent and the Grenadines     |
| Rest of Latin America            | XLM  | VEN | Venezuela, Bolivarian Republic of    |
| Rest of Latin America            | XLM  | VGB | Virgin Islands, British              |
| Rest of Latin America            | XLM  | VIR | Virgin Islands, U.S.                 |
| Rest of East and South East Asia | XSE  | VNM | Viet Nam                             |
| Rest of Asia                     | XSA  | VUT | Vanuatu                              |
| Rest of Asia                     | XSA  | WLF | Wallis and Futuna                    |

|              |     |     |              |
|--------------|-----|-----|--------------|
| Rest of Asia | XSA | WSM | Samoa        |
| Middle East  | XME | YEM | Yemen        |
| Other Africa | XAF | ZAF | South Africa |
| Other Africa | XAF | ZMB | Zambia       |
| Other Africa | XAF | ZWE | Zimbabwe     |
