# Supplementary material for: Transient reliance on carbon removal and storage in long-term energy system transitions
Source: Research Square preprint supplement (doi:10.21203/rs.3.rs-8393021/v1), 2026-01-30

# Primary energy and final energy World

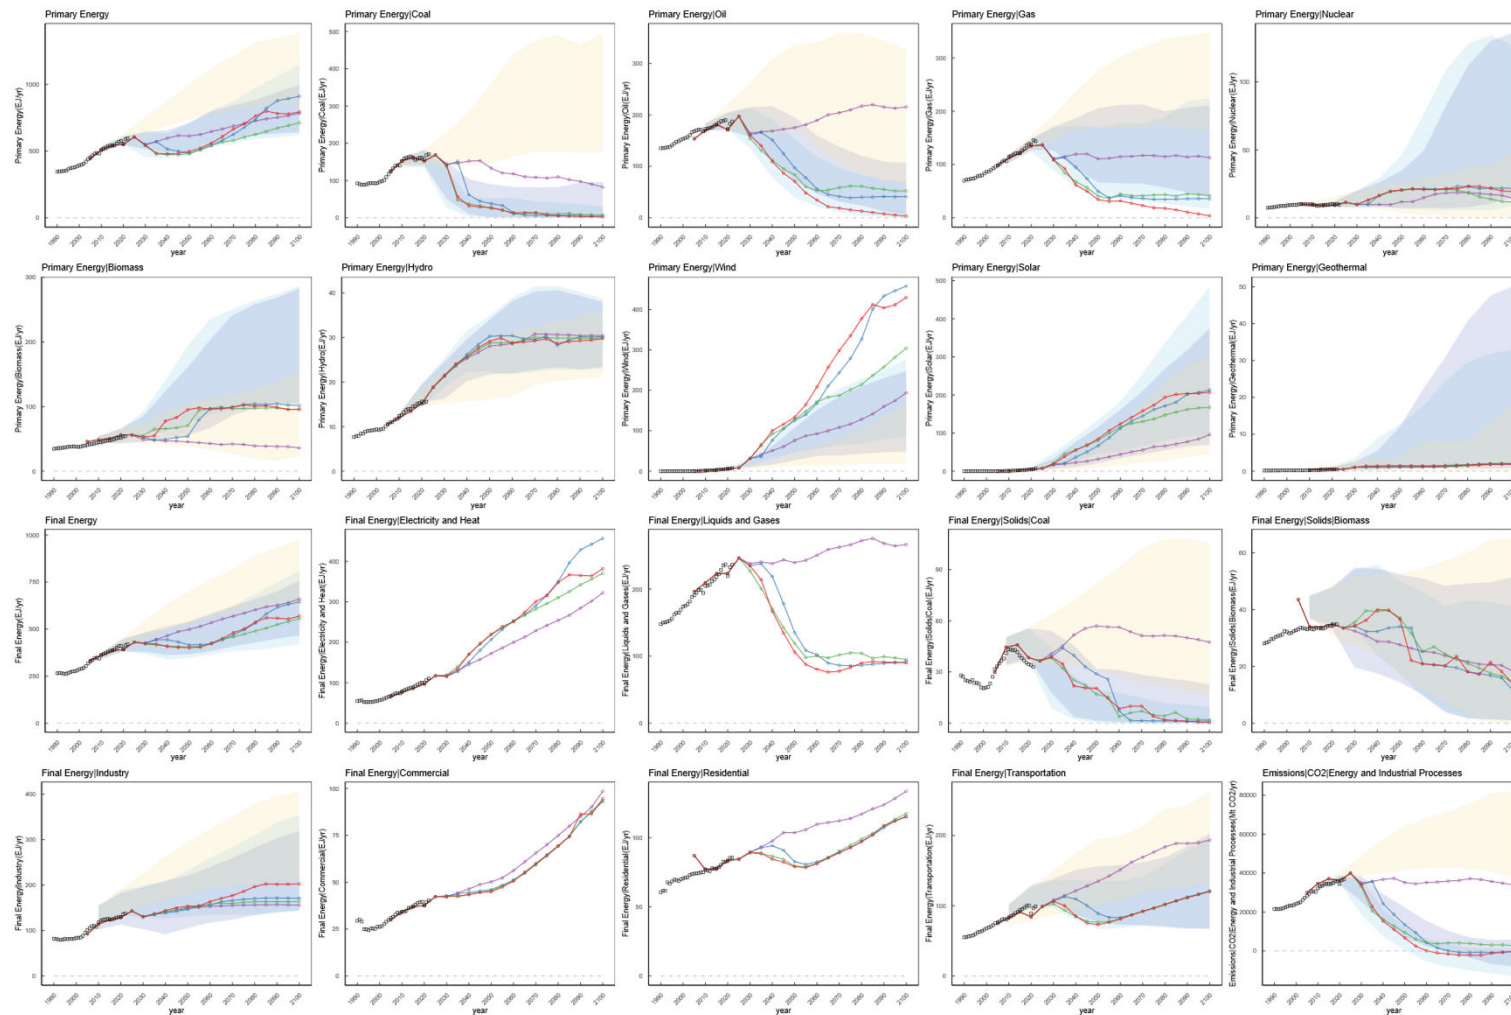

# Primary energy and final energy

## R10LATIN\_AM

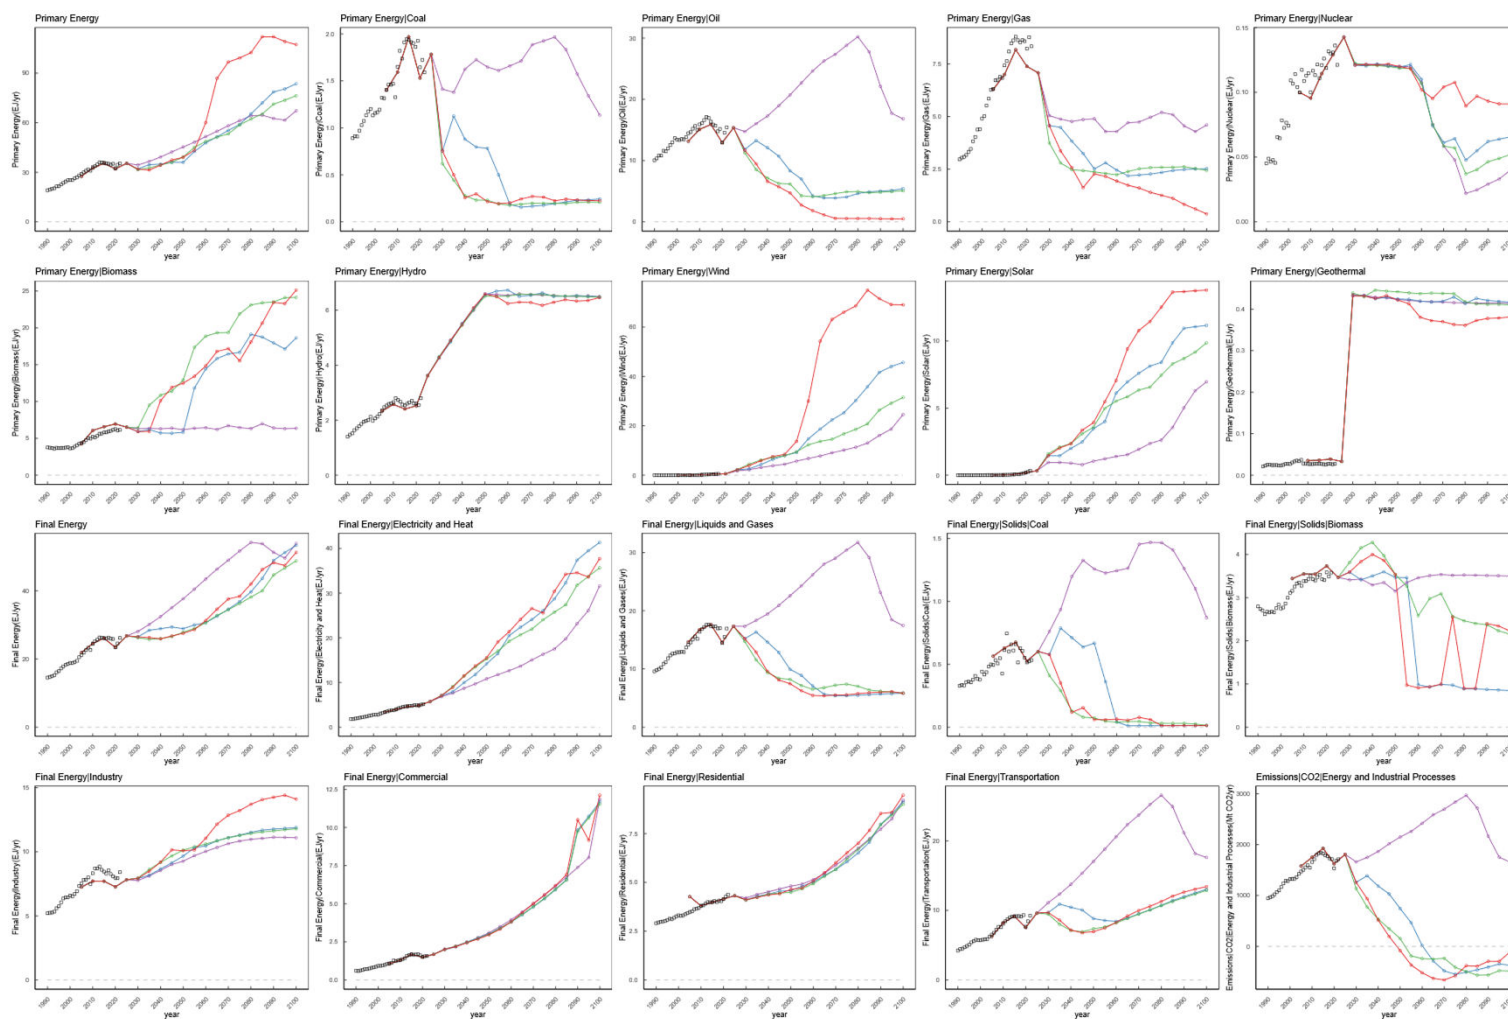

# Primary energy and final energy

## R10NORTH\_AM

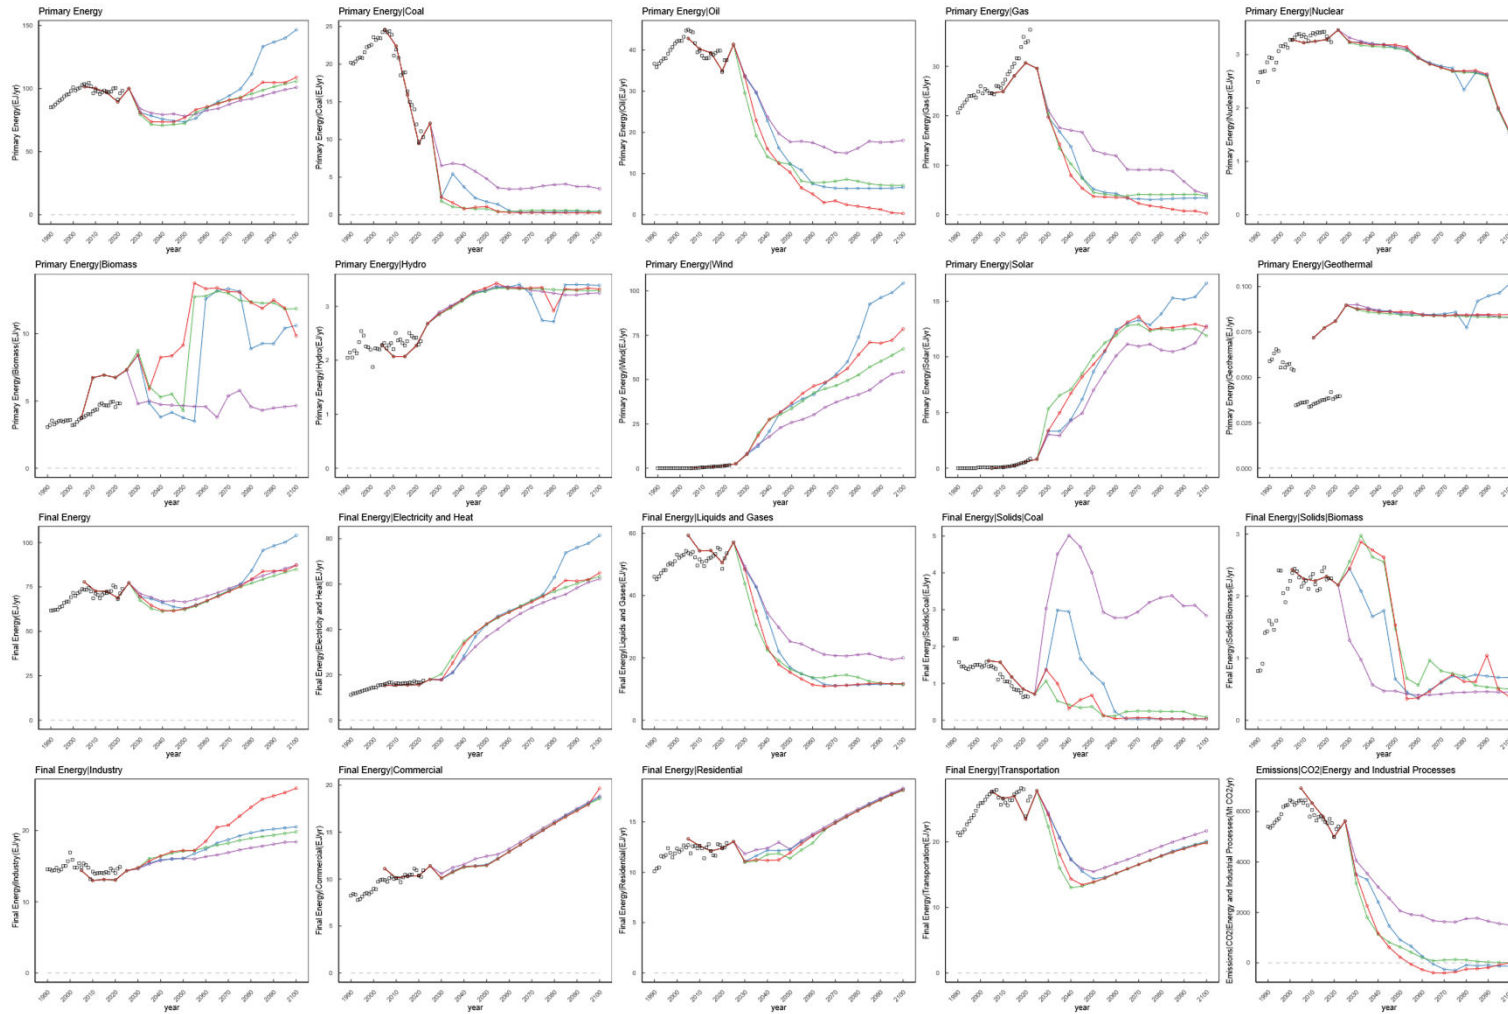

# Primary energy and final energy

## R10CHINA+

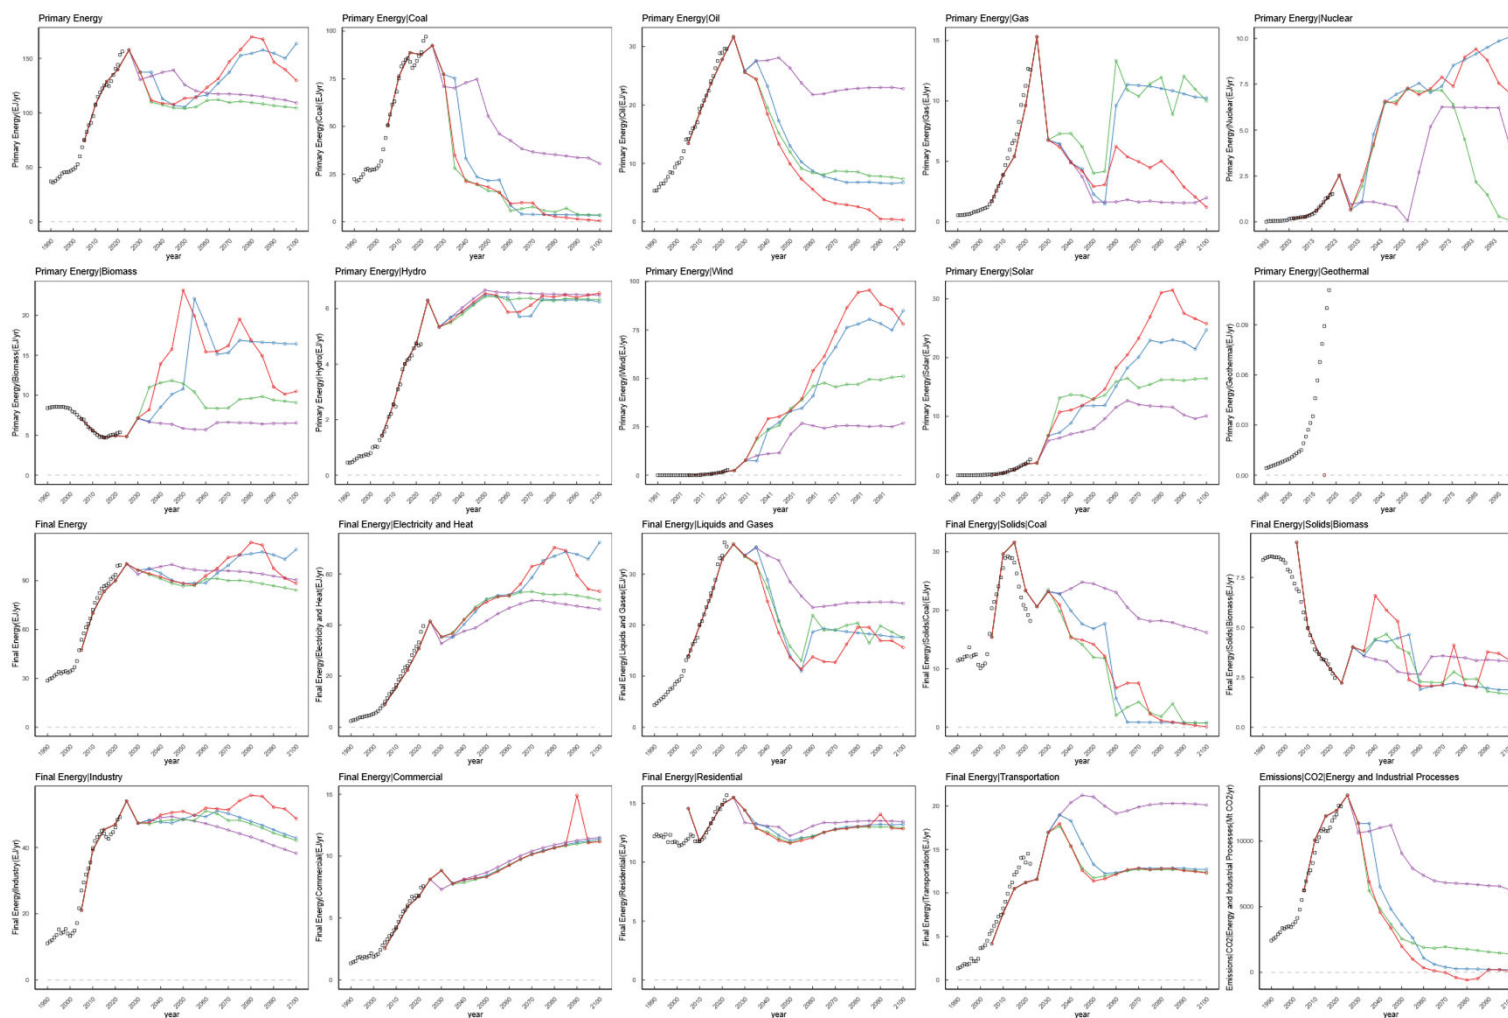

# Primary energy and final energy

## R10REF\_ECON

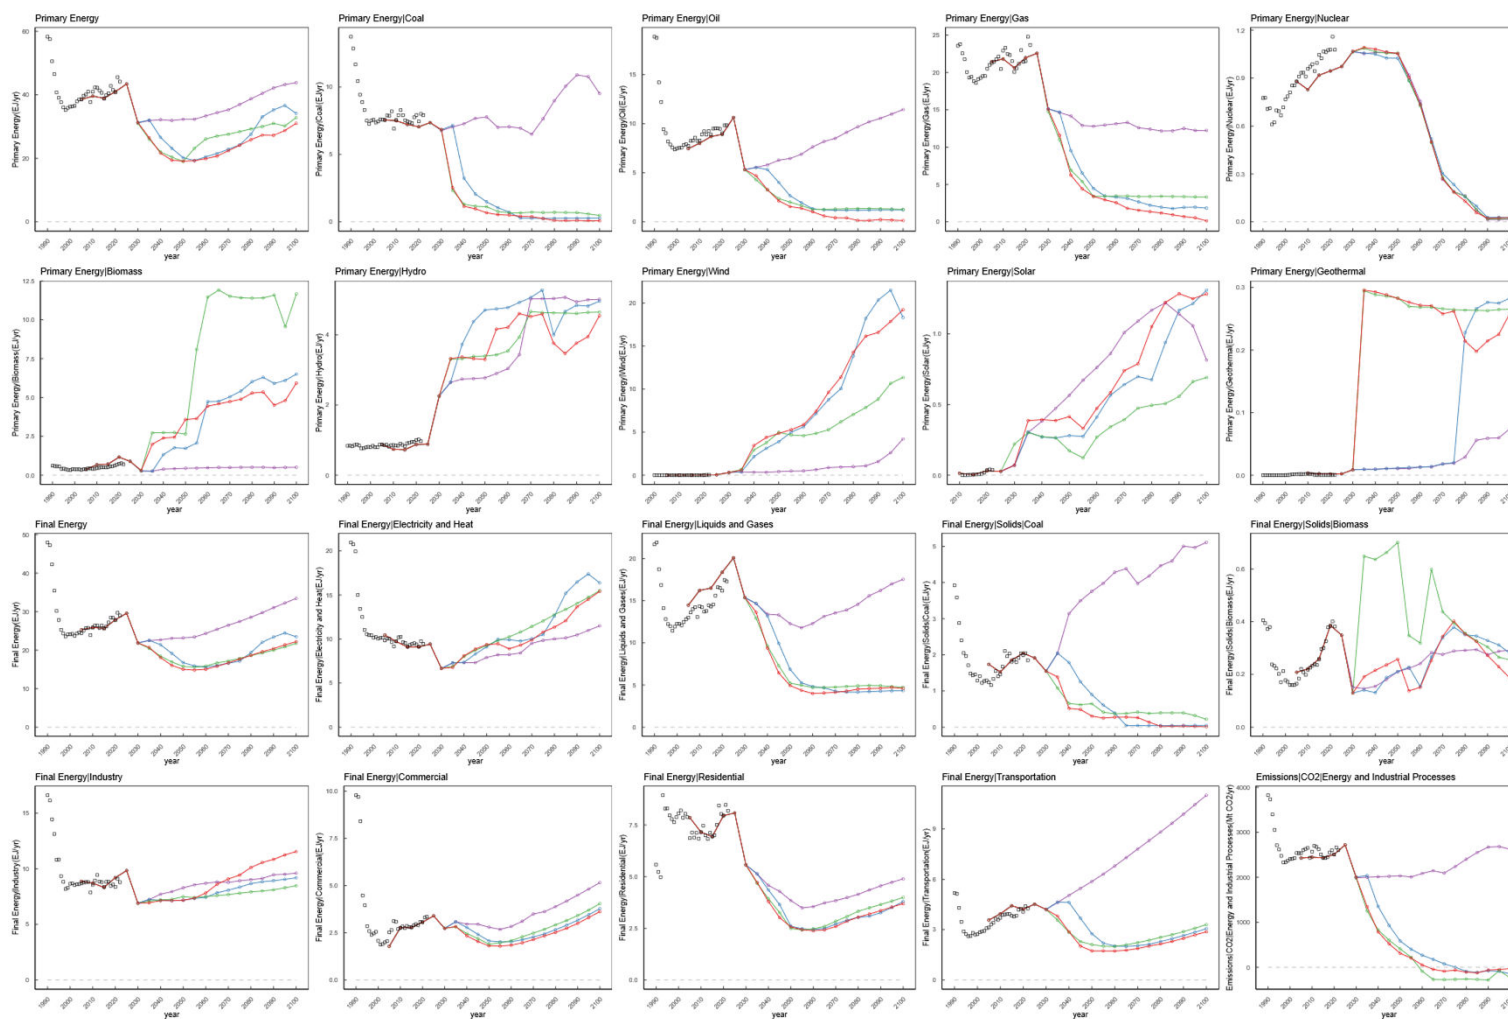



# Primary energy and final energy

## R10INDIA+

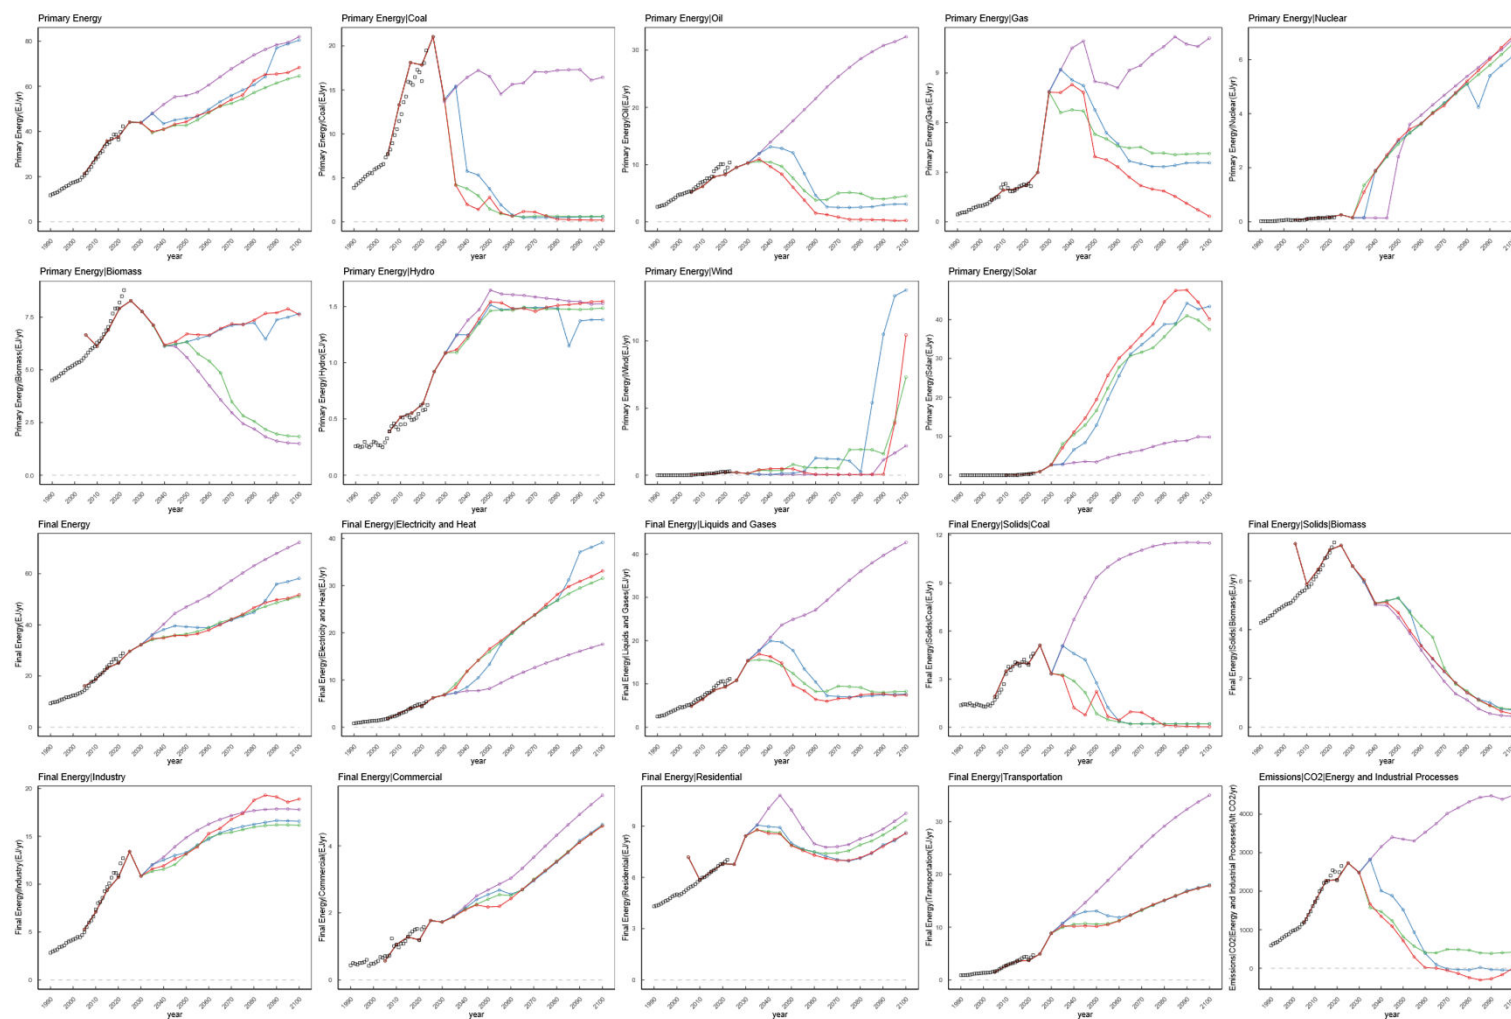

# Primary energy and final energy

## R10PAC\_OECD

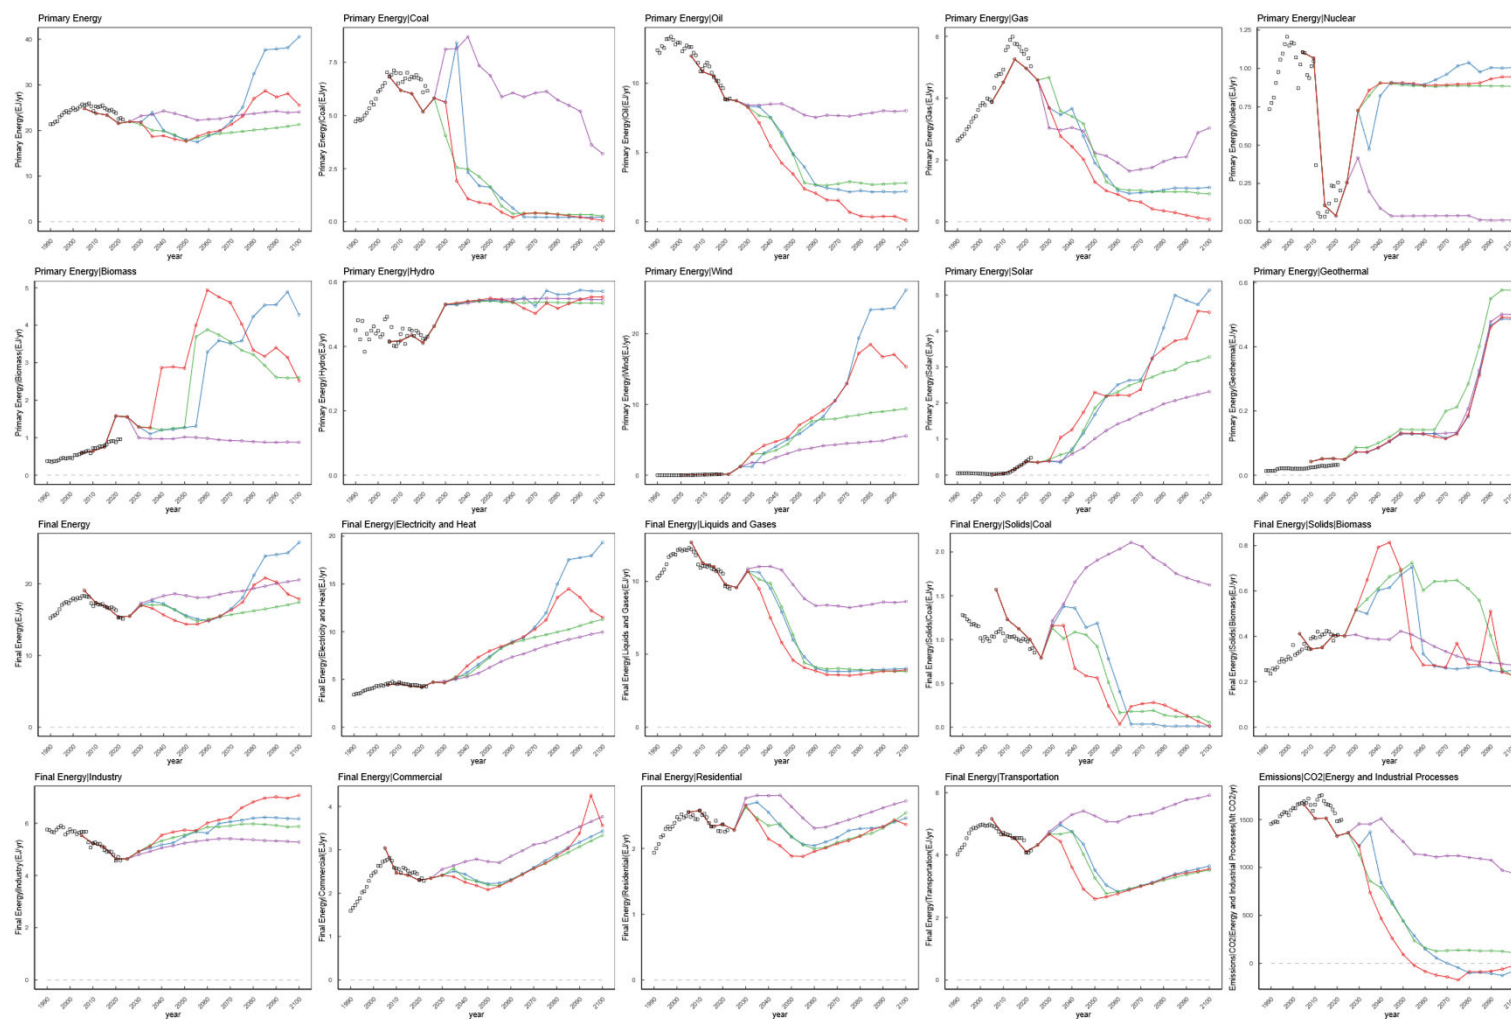

# Primary energy and final energy

## R10EUROPE

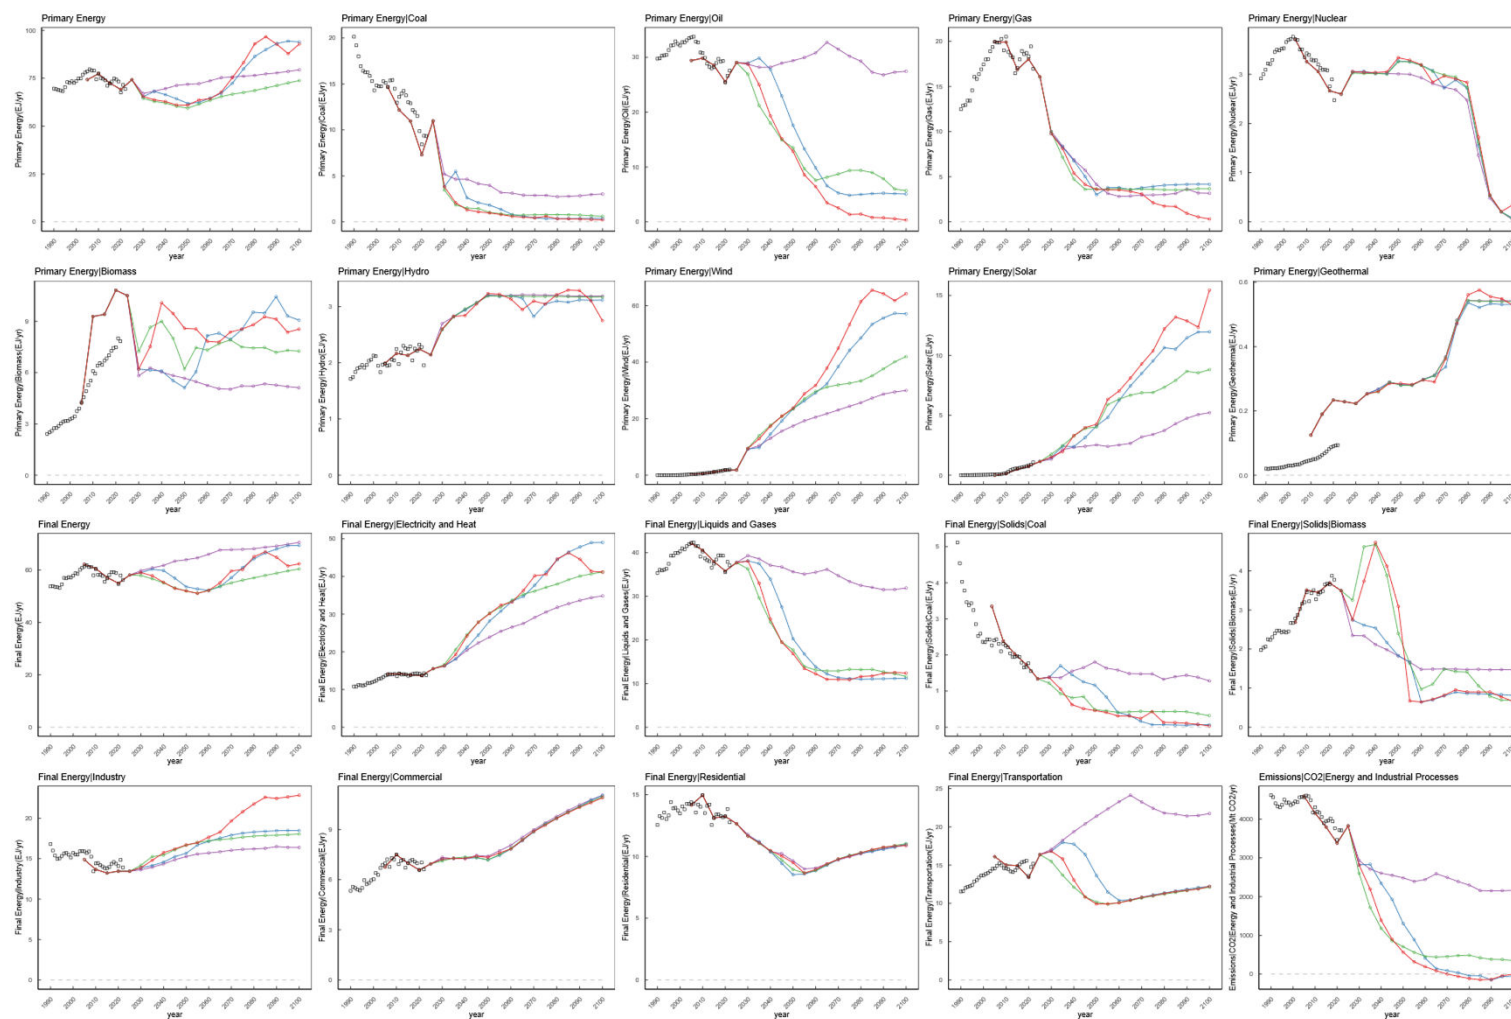



# Primary energy and final energy

## R10AFRICA

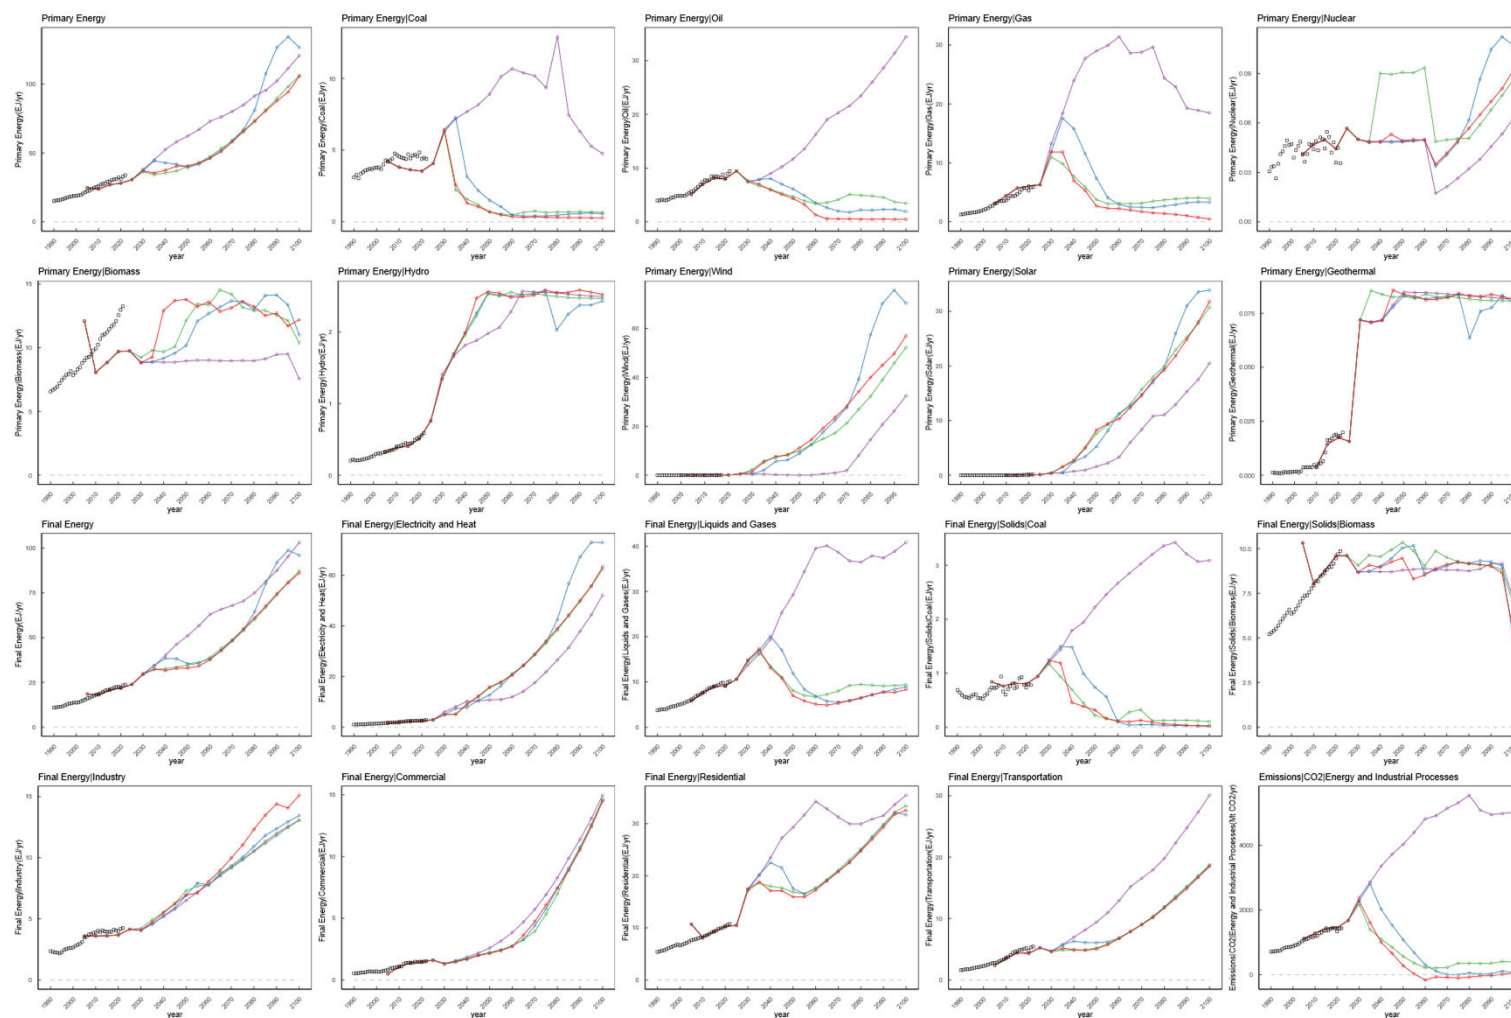

# Primary energy and final energy

## R10MIDDLE\_EAST

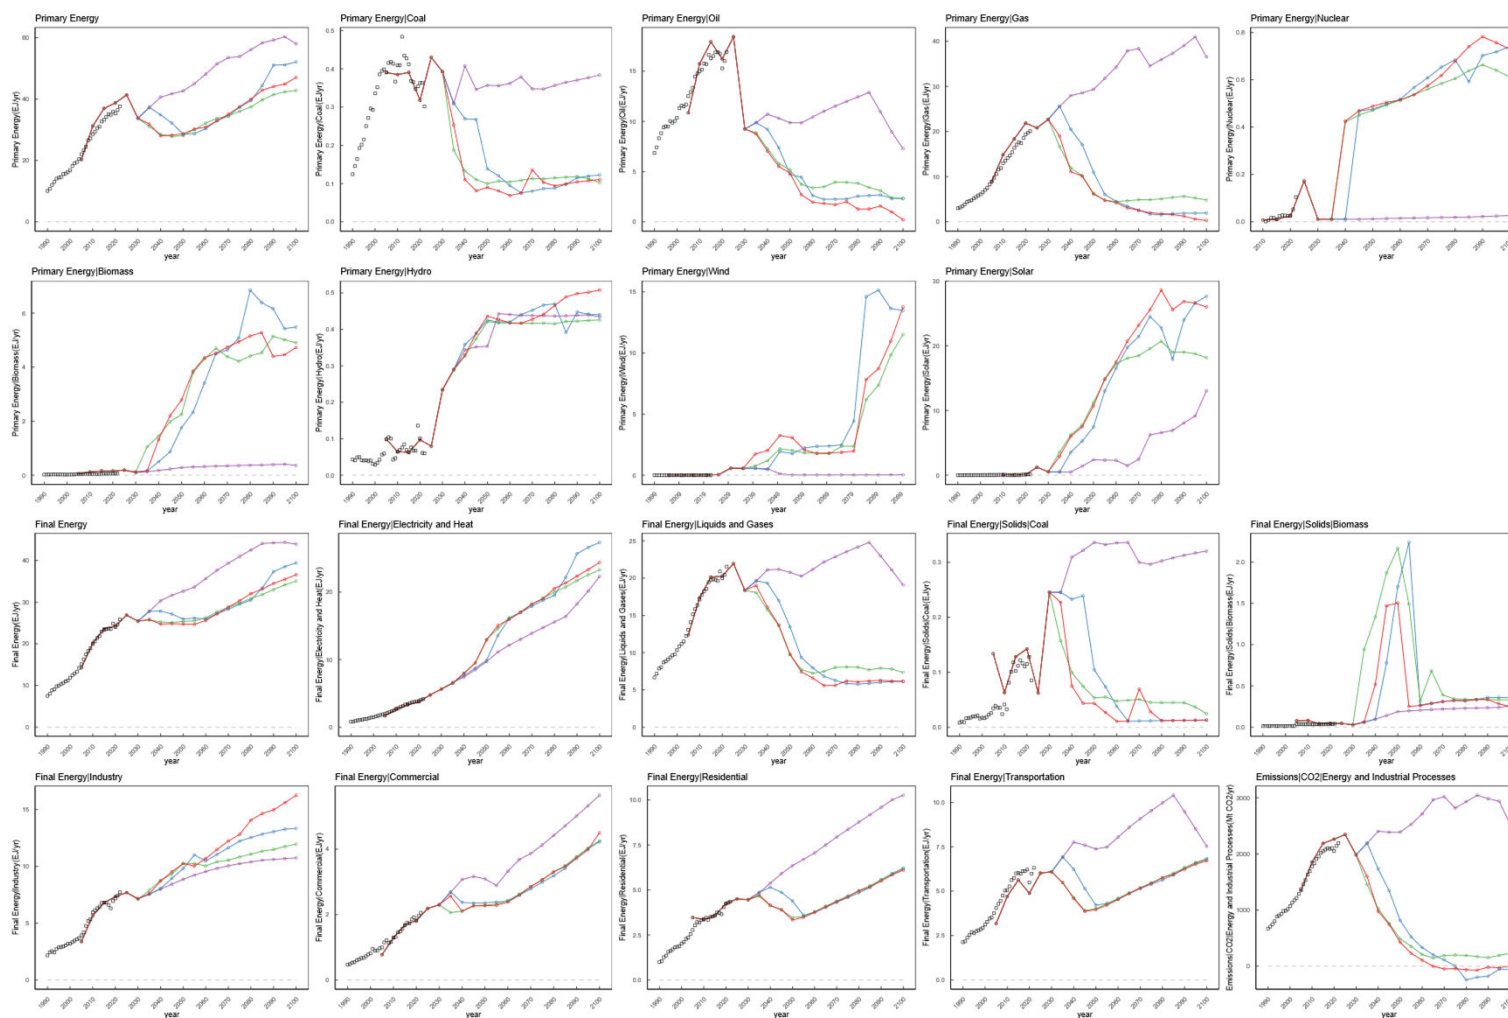

# Primary energy and final energy

## R10REST\_ASIA

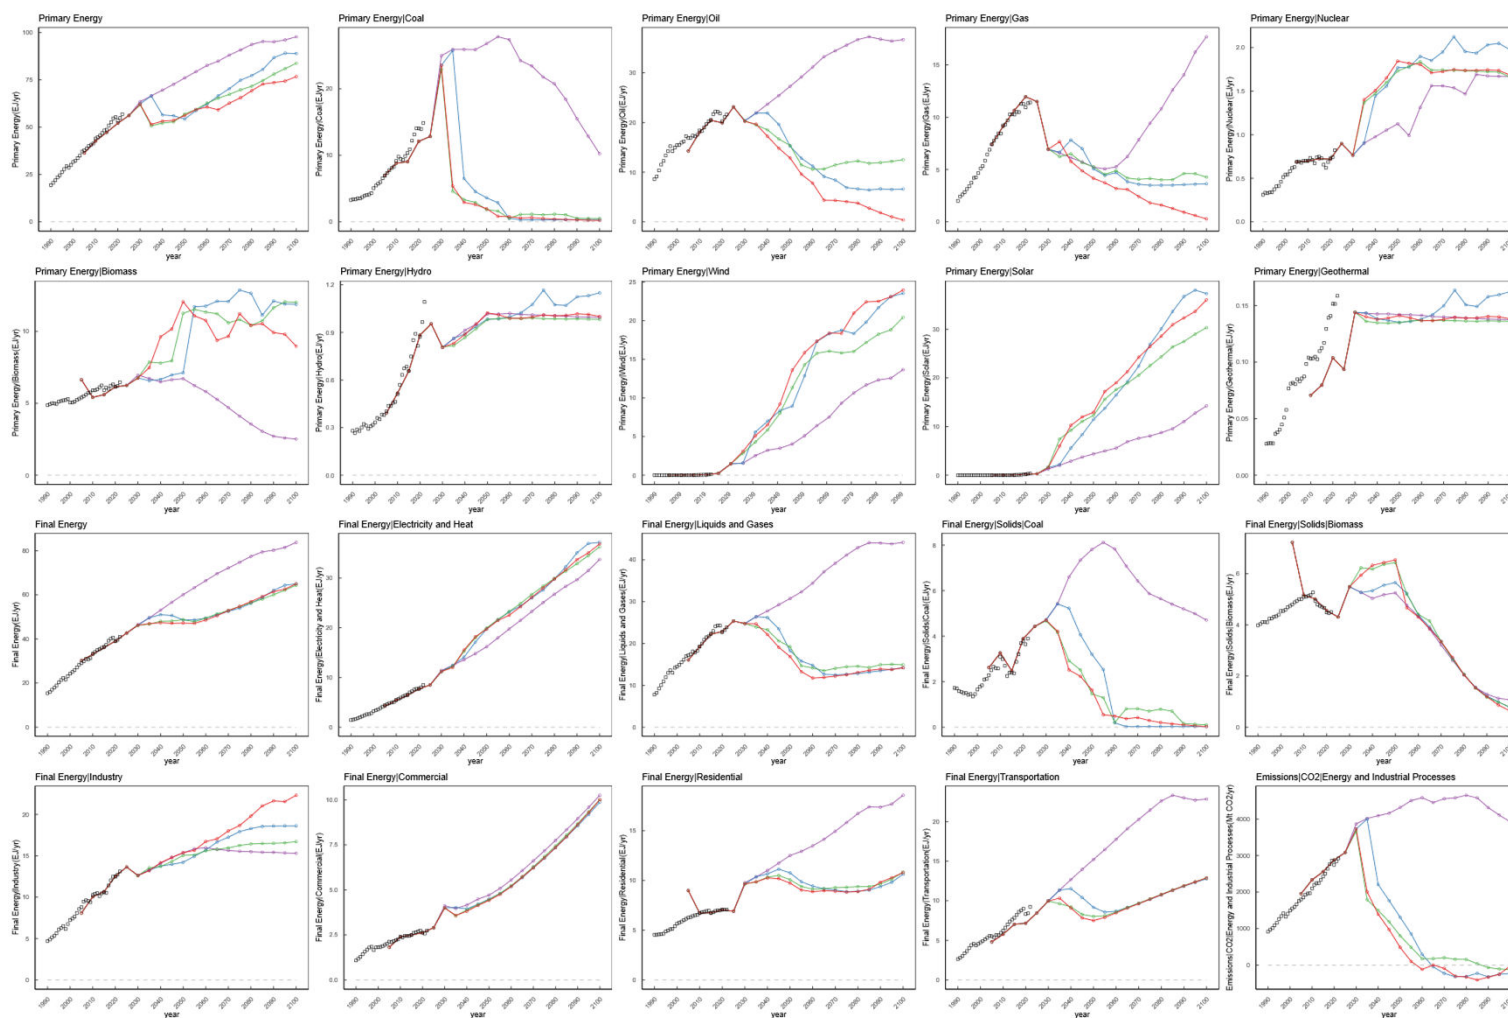

Supplement: Supplementary file 2 [file b912fa76176ca0e0f7db6035.pdf]
